# Neurophysiological correlates of residual inhibition in tinnitus: Hints for trait-like EEG power spectra

Schoisswohl S.<sup>1</sup>, Schecklmann, M.<sup>1</sup>, Langguth, B.<sup>1</sup>, Schlee, W.<sup>1</sup>, and Neff, P.<sup>1,2,3</sup>

<sup>1</sup>Department of Psychiatry and Psychotherapy, University of Regensburg, Regensburg, Germany.

<sup>2</sup>University Research Priority Program 'Dynamics of Healthy Aging', University of Zurich, Zurich, Switzerland.

<sup>3</sup>Center for Cognitive Neuroscience, University of Salzburg, Austria

**Corresponding Author:**

**Full name:** Stefan Schoisswohl

**Department:** Department of Psychiatry and Psychotherapy

**Institute/University/Hospital:** University of Regensburg

**Street Name & Number:** Universitaetsstrasse 84

**City, State, Postal code, Country:** 93053 Regensburg, Germany

**Tel:** 0049 941 941 2098

**E-mail:** stefanschoisswohl@yahoo.de

## Abstract

Magneto- and electroencephalography (M/EEG) investigations in tinnitus patients demonstrated anomalous oscillatory brain activity patterns compared to healthy controls. A well-established phenomenon in tinnitus is the possibility to temporarily suppress tinnitus following acoustic stimulation, which is termed residual inhibition (RI). The few former neurophysiological investigations of RI reported partly conflicting results hampering consensus on tinnitus-specific brain activity and basic neural models.

Hence, our objective was to investigate RI-specific oscillatory brain activity changes and whether these changes can be associated with behavioral measures of tinnitus loudness. Further, contrasts between acoustic stimulation responders and non-responders provide further insights in RI-related spontaneous brain activity.

Three different types of noise stimuli were administered for acoustic stimulation in 45 tinnitus patients. Subjects resting state brain activity was recorded before and during RI via EEG alongside with subjective measurements of tinnitus loudness.

On the whole-group level, tinnitus-unspecific changes were observed which fit established knowledge about basic neural responses after acoustic stimulation. Responder non-responder contrasts revealed differences in alpha and gamma band activity in line with the proposed neural models for oscillatory brain activity in tinnitus. Further analysis of sample characteristics demonstrated divergences between responders and non-responders notably for tinnitus duration. During RI, distinct differences between responders and non-responders were exclusively observed for alpha band activity in auditory cortical areas. Neither correlations of behavioral tinnitus measures nor differences between stimulus-induced changes in ongoing brain activity could be detected.

Taken together, our observations might be indicative of trait-specific forms of oscillatory signatures in different subsets and chronification grades of the tinnitus population possibly related to acoustic tinnitus suppression. Results and insights are not only useful to understand basic neural mechanisms behind RI but are also valuable for general neural models of tinnitus.



## Highlights

- Residual inhibition provides a key method to study the basic mechanisms of tinnitus.
- We compared residual inhibition EEG activity between responders and non-responders.
- In responders, the alpha activity in auditory areas was increased during tinnitus suppression.
- Results and insights are valuable for understanding the neural mechanisms behind acoustic tinnitus suppression.

## Keywords

tinnitus suppression, resting state, electroencephalography, acoustic stimulation, residual inhibition

# 1 Introduction

1 Subjective tinnitus is defined as the perception of a ringing or hissing without the presence  
2 of a corresponding internal or external source of sound. If this phantom sound perception  
3 is present over a period of at least six months, it is considered as chronic [Mazurek et al.,  
4 2010]. About 10-15% of the global population suffers from tinnitus, whereas in 1-2% it  
5 represents a severe burden [Langguth et al., 2013; Heller, 2003; Erlandsson and Dauman,  
6 2013] with comorbidities such as depression, anxiety disorder, sleep disorder or reduced  
7 quality of life [Croenlein et al., 2016; Nondahl et al., 2007; Weidt et al., 2016; Trevis et al.,  
8 2016].

9 Currently there is no treatment option for tinnitus available. A major challenge towards  
10 an identification of a treatment is related to heterogeneity in tinnitus phenotypes [Hesse,  
11 2016; Kleinjung and Langguth, 2020; Cederroth et al., 2019; Zenner et al., 2017]. Up to  
12 now, cognitive behavioral therapy represents the treatment option with the best available  
13 evidence for tinnitus [Landry et al., 2020; Cima et al., 2012; Li et al., 2019; Fuller et al.,  
14 2020].

15 In the majority of cases, tinnitus develops as a consequence of cochlear damages  
16 subsequent to noise trauma or hearing loss (HL) [Langguth et al., 2013]. Typically, the  
17 perceived tinnitus pitch corresponds to the frequency range of maximum HL [Basile et al.,  
18 2013; Roberts et al., 2008; Norena et al., 2002; Schecklmann et al., 2012]. Theories  
19 about the generation of tinnitus commonly suggest that the reduced or missing auditory  
20 input triggers maladaptive alterations along the auditory pathway and the central auditory  
21 system, which may lead to the sensation of a phantom sound in the frequencies of the  
22 peripheral HL [Eggermont, 2007; Eggermont and Roberts, 2012; Eggermont and Tass,  
23 2015; Adjamian et al., 2009].

24 On a macroscopic level tinnitus was associated with anomalous oscillatory brain activ-  
25 ity patterns such as enhanced activity in the delta and gamma frequency range alongside  
26 with reduced alpha activity over temporal regions [Weisz et al., 2005, 2007b]. As observed  
27 in several neurophysiological investigations, this delta increase and alpha decrease ap-  
28 pears to be closely linked to tinnitus perception as well as tinnitus distress [Weisz et al.,  
29 2005; Schlee et al., 2014; Adjamian et al., 2012; Moazami-Goudarzi et al., 2010; Balken-  
30 hol et al., 2013]. Due to relations with tinnitus loudness as defined via tinnitus pitch  
31 matching [Balkenhol et al., 2013], subjective tinnitus loudness [van der Loo et al., 2009;  
32 De Ridder et al., 2015a] or tinnitus-specific increased activity in the auditory cortex [Ash-  
33 ton et al., 2007; Vanneste et al., 2011], high gamma activity was proposed to represent  
34 the oscillatory signature of tinnitus perception per se [Weisz et al., 2007b]. These tinnitus-  
35 specific spontaneous brain activity patterns were subsumed under the framework of the  
36 thalamo-cortical dysrhythmia model (TCD) [Llinás et al., 1999, 2005; De Ridder et al.,

37 2015b], which was further expanded to the “Synchronization-by-Loss-of-Inhibition-Model”  
38 (SLIM) [Weisz et al., 2007a].

39 Conversely, some studies neither observed altered delta and alpha activity in tinni-  
40 tus [Ashton et al., 2007], any power spectra differences compared to healthy controls  
41 [Zobay et al., 2015] nor correlations between electrophysiology and psychoacoustic or  
42 psychosocial tinnitus measures [Pierzycki et al., 2016]. In the same vein, further studies  
43 report higher alpha activity in tinnitus [Moazami-Goudarzi et al., 2010], a relationship of  
44 enhanced alpha and tinnitus intensity [Meyer et al., 2014] or emphasize the relevance  
45 of other frequency bands like beta and theta in neural activity related to tinnitus [Meyer  
46 et al., 2014; Moazami-Goudarzi et al., 2010; Balkenhol et al., 2013]. Considering these  
47 observations, assumptions about abnormal tinnitus-specific respectively tinnitus-related  
48 spontaneous brain activity are not so conclusive as presumed initially.

49 The phenomenon of short-term tinnitus suppression following acoustic stimulation was  
50 first studied almost 50 years ago [Feldmann, 1971, 1983]. This phenomenon was defined  
51 as “residual inhibition” (RI) and can be observed in 60-80% of tinnitus sufferers, whereby  
52 depth and duration of suppression patterns vary among individuals [Roberts et al., 2006;  
53 Roberts, 2007; Vernon and Meikle, 2003]. Since that time several experiments already  
54 examined the impact of various auditory stimulation techniques on RI. These vary from  
55 simple white noise (WN) or pure tones, to the application of specific filters or modula-  
56 tion rates, up to the combination of both modulation techniques applied to WN [Henry  
57 et al., 2013; Fournier et al., 2018; Roberts et al., 2006, 2008; Tyler et al., 2014; Reavis  
58 et al., 2012; Bates et al., 2015; Neff et al., 2017, 2019b; Schoisswohl et al., 2019]. It has  
59 been suggested that stimulation intensity, duration, specific modulations as well as stim-  
60 uli including the individual tinnitus frequency (ITF) facilitate short-term acoustic tinnitus  
61 suppression.

62 Another approach to reduce subjective tinnitus loudness for a longer period of time is  
63 provided via long-term stimulation with notch filtered music (individual tinnitus pitch is re-  
64 moved from the signal), referred to as “tailor-made notched music training” (TMNMT). The  
65 supposed underlying physiological effect behind TMNMT takes place through an inhibition  
66 of frequencies within the notch filter called lateral inhibition. By means of long term appli-  
67 cations, maladaptive pathological reorganization of the auditory cortex in tinnitus may be  
68 reversed [Pantev et al., 2012; Okamoto et al., 2010].

69 Nevertheless, little is known about the basic neurophysiological processes behind RI  
70 [Roberts, 2007]. Reduced firing rates of neurons in the central auditory pathway are the-  
71 orized to play a key role in RI [Galazyuk et al., 2017, 2019], which covers subcortical  
72 structures of the auditory system. There is a paucity in experimental studies examining  
73 oscillatory brain activity after acoustic stimulation or rather during RI. With the help of  
74 neuromagnetic measures in one tinnitus subject Kristeva-Feige et al. [1995] observed an

75 increase in low frequency (2-8 Hz) spectral power during RI. Contrary to this observation,  
76 single-subject intracranial recordings showed a reduction of low frequency (delta: 1-4  
77 Hz; theta: 4-8 Hz) activity in the auditory cortex during RI. These tinnitus-related low fre-  
78 quency oscillations also interacted with alpha (8-12 Hz), beta (20-28 Hz) and gamma (>30  
79 Hz) activity [Sedley et al., 2015]. Beyond that, tinnitus intensity during RI was identified  
80 to be connected to delta (1.5-4 Hz), theta (4-8 Hz) and gamma (30-150 Hz) oscillatory  
81 activity in the auditory cortex by the use of single patient measurements of neuromag-  
82 netic brain activity. The relevance of auditory gamma band activity for RI respectively  
83 tinnitus perception could be further corroborated by means of an inverse correlation with  
84 tinnitus intensity exclusively in tinnitus subjects experiencing residual excitation [Sedley  
85 et al., 2012]. Kahlbrock and Weisz [2008] evaluated neuromagnetic activity in 10 tinnitus  
86 patients experiencing RI, defined as 50% of tinnitus loudness reduction for 30 seconds  
87 after stimulation offset. A reduction of delta (1.3-4 Hz) activity in temporal areas was ob-  
88 served during RI, whereas the gamma band (low: 30.5-49 Hz; high: 50.3-70.2 Hz) was  
89 not affected. The authors conclude that during a short-term reduction of tinnitus inten-  
90 sity, tinnitus-related abnormal oscillatory activities are temporary reversed resulting in a  
91 restored balance of neural inhibitory and excitatory processes. A recent study from King  
92 et al. [2020] investigated ongoing electrophysiological brain activity of 30 tinnitus sub-  
93 jects following broad band noise stimulation. 17 participants were able to experience RI,  
94 whereby a comparison of RI with a control auditory stimulation condition without the abil-  
95 ity to induce RI revealed differences with respect to ongoing brain activity. In detail, the  
96 authors report higher power in the alpha and gamma frequency bands over the course of  
97 RI compared to the control condition.

98 To the best of our knowledge, the above mentioned five studies represent the only  
99 attempts to investigate resting state oscillatory brain activity in the context of RI. The  
100 fact that available findings are inconsistent and that merely two experiments - one utiliz-  
101 ing magnetoencephalography (MEG) and one Electroencephalography (EEG) - analyzed  
102 spontaneous brain activity during RI on a group level indicates an urgent need for respec-  
103 tive research whether it is by means of MEG or EEG. Besides single subject analysis,  
104 group level analysis represent a basic pillar in science in order to make more general  
105 statements about the investigated population e.g., ongoing brain activity associated with  
106 RI.

107 Previous research utilizing neurophysiological measurements, used only one type of  
108 non-personalized sound and did not compare participants with and without RI. In the  
109 course of this study we are employing an extended set of modified and personalized noise  
110 stimuli targeting putatively differential neural mechanisms (i.e., RI and lateral inhibition).  
111 Thus the main purpose of this EEG experiment was to examine oscillatory brain activ-  
112 ity changes during RI (pre vs. post) following a stimulation with different types of noise.

113 Moreover we aimed to investigate, whether these changes are related to subjective tinni-  
114 tus loudness ratings. Since RI is a phenomenon which cannot be induced in all people  
115 with tinnitus, differences in spontaneous brain activity between people who reported RI  
116 and those who didn't were analyzed (responders vs. non-responders).

117 Apart from the efficacy of each used stimulus type in short-term tinnitus suppression  
118 on a group level, we hypothesize that filtered noise would result in stronger suppression  
119 patterns compared to unfiltered noise. In detail, bandstop-filtered noise is assumed to  
120 produce the strongest effect via a potentially suppression of neurons reacting to frequen-  
121 cies within the filter range as already shown in long-term applications via TMNMT [Pantev  
122 et al., 2012; Okamoto et al., 2010].

123 Due to the lack of past research in this field, we have no direct stimulus-specific a  
124 priori hypothesis about the types of changes from pre to post auditory stimulation in on-  
125 going brain activity. However, we assume that potential changes in spontaneous brain  
126 activity can be associated with subjective tinnitus loudness ratings after stimulation. In  
127 accordance to Kahlbrock and Weisz [2008] we expect a decrease in delta and gamma  
128 activity as well as an increase in alpha activity from pre to post auditory stimulation in  
129 tinnitus cases experiencing RI (responders). Further we anticipate spectral power differ-  
130 ences in the respective frequency bands between acoustic stimulation responders and  
131 non-responders. In order to link these differences to auditory cortical activation, source  
132 localization of the EEG data was performed.

## 133 **2 Methods**

### 134 **2.1 Participants**

135 In the course of this study, N = 45 (14 female) patients with chronic subjective tinnitus  
136 (> 6 months tinnitus duration) were recruited from the Interdisciplinary Tinnitus Centre  
137 Regensburg, Germany. For participation, patients had to fulfill the following primary in-  
138 clusion criteria: age between 18 and 75 years; absence of other causes for tinnitus e.g.,  
139 Meniere's disease, otosclerosis or acoustic neurinoma; no infection of the oropharynx;  
140 no present somatic, neurological or psychiatric disorder; no intake of psychoactive medi-  
141 cation (e.g., antidepressants or anticonvulsant drugs), respectively substance or alcohol  
142 abuse at least 12 weeks before the start of the experiment; no hypersensitivity to sound;  
143 no tinnitus frequency < 1 kHz; no concurrent participation in other tinnitus-related studies  
144 or start of any other tinnitus-related treatment in the last three months prior study start.

145 Ethical clearance with respect to methodological approach and design was sought  
146 from the ethics committee of the University of Regensburg, Germany before commenc-  
147 ing the experiment (ethical approval number: 17-819-101). For a detailed descriptive  
148 overview and clinical characteristics of the sample see table 1. All participants received  
149 detailed information about objective, methods, duration and potential side effects of the  
150 study. Every participant gave written informed consent before the start of the study and  
151 received an appropriate expense allowance after completion of the experiment.

### 152 **2.2 Psychometry**

153 Prior to the start of the experiment, participants were requested to answer a set of  
154 questionnaires compiled of German versions of the Tinnitus Handicap Inventory (THI)  
155 [Newman et al., 1994; Kleinjung et al., 2007], the Tinnitus Questionnaire (TQ) [Goebel  
156 and Hiller, 1994; Hallam et al., 1988], the Tinnitus Sample Case History Questionnaire  
157 (TSCHQ) [Langguth et al., 2007], visual analog scales (VAS, %) for tinnitus awareness,  
158 loudness and bothersome, as well as the Questionnaire on Hypersensitivity to Sound  
159 (GUF) [Blaesing et al., 2010] (participants with a score of > 23, which constitutes a very  
160 severe impairment, were excluded from our analysis). The survey was performed with  
161 SoSci Survey [Leiner, 2016].

### 162 **2.3 Audiometry**

163 Participants hearing thresholds were examined with the toolbox MultiThreshold (Univer-  
164 sity of Essex, United Kingdom) using the implemented paradigm absolute threshold (ab-  
165 sThreshold) in Matlab (Matlab R2017a; Mathworks, USA). This paradigm is an imple-

166 mentation of the two-alternatives forced-choice threshold estimation algorithm by Green  
167 [1993]. Sine tones (0.5 seconds) were used to test participants hearing level for fre-  
168 quencies from 250 up to 8000 Hz on an octave scale for each ear separately. Starting  
169 loudness level was 30 dB SPL, which was increased by 10 dB steps until the participants  
170 were able to perceive the sound. The loudness level was raised by 2 dB steps between  
171 trials. ER-2 Insert Earphones (Etymotic Research Inc., USA) together with an external  
172 soundcard (RME Fireface UCX; Audio AG, Germany) were used for hearing assessment,  
173 subsequent matching of the ITF, definition of the sensation level (SL), minimum masking  
174 level (MML) (compare section 2.4) as well as the proper auditory stimulation.

## 175 **2.4 Tinnitometry**

176 Individual tinnitus pitch matching was carried out using a Method of Adjustment approach  
177 modified from Henry et al. [2013] and Roberts et al. [2008] and implemented in a custom  
178 software tool (MAX 7; Cycling'74, USA). A custom-built hardware controller was used  
179 comprising a Teensy 3.2 USB-based micro-controller (PJRC, USA) and industrial-grade  
180 rotating knobs, switches and motor faders. Detailed information about the used tinni-  
181 tus matching procedure is described in Neff et al. [2019b]. The starting frequency was  
182 defined as one frequency group below the frequency with the highest HL and a start loud-  
183 ness of 10 dB above the particular hearing threshold. Participants tried to match their  
184 tinnitus four times as good as possible and rated the accordancy of the matched sound  
185 with their perceived tinnitus on a 1-10 scale (1 = no accordancy; 10 = perfect accordancy)  
186 after each attempt. The tinnitus matching trial with the highest rating was subsequently  
187 defined as the participants ITF. If participants rated different matching attempts similarly,  
188 the frequency closest to the mean frequency of the four attempts was chosen. The ITF  
189 was then used for the evaluation of further audiometric parameters. Similarly, the MML  
190 was defined by increasing the loudness of WN to the point of complete tinnitus mask-  
191 ing. Assessment of the loudness discomfort level (LDL) of participants ITF was executed  
192 with the discomfort paradigm of the MultiThreshold toolbox with Sennheiser HDA 2000  
193 headphones (Sennheiser, Germany).

## 194 **2.5 Acoustic stimulation**

195 Three different types of noise stimuli with a duration of three minutes each were created  
196 in Matlab (Matlab R2017a; Mathworks, USA) with an intensity of 65 dB SL (defined as  
197 the loudness level of participants first-time tinnitus pitch perception; maximum loudness  
198 of 85 dB SPL) for acoustic stimulation. For this purpose a genuine WN was used to  
199 produce individualized noise stimuli through the implementation of bandpass (IBP) and



200 bandstop (IBS) filters with one octave width around the ITF [Pantev et al., 2012]. Each  
201 stimuli was composed of a 1000 ms linear fade-in and fade-out phase and underwent a  
202 root-mean-square correction to balance levels between stimuli. Diotic acoustic stimulation  
203 was performed at a maximum loudness of 85 dB SPL and each stimuli was presented only  
204 once. The presentation sequence of the stimuli was randomized.

205 Before and after the presentation of each stimuli (3 minutes), participants were re-  
206 quested to sit quietly, focus on a white fixation cross on a black screen and avoid exten-  
207 sive eye-blinks and movements while their brain activity was recorded via EEG for three  
208 minutes respectively (compare section 2.7).

209 After the presentation of each noise stimulus, patients had to rate the loudness of  
210 their tinnitus at seven different time points (0sec, 30sec, 60sec, 90sec, 120sec, 150sec  
211 and 180sec after stimulation offset) on a customized keyboard strip (X-Key-Stick-16-USB,  
212 XK-0981-UCK16-R; P.I. Engineering, USA) with a numeric rating scale from 0% to 110%,  
213 whereas 100% signified no tinnitus loudness changes, 0% a total absence of tinnitus and  
214 110% an tinnitus loudness increase by 10 %. For an illustration of the acoustic stimula-  
215 tion procedure please see figure 1. The whole experimental stimulation procedure was  
216 implemented with the Psychophysics Toolbox Version 3 [Brainard, 1997; Kleiner et al.,  
217 2007] in Matlab (Matlab R2017a; Mathworks, USA) and double-blinded. At the end of the  
218 experiment, the three stimuli were again presented in a randomized order for 10 seconds  
219 each and participants were requested to rate the valence and the arousal of each stimuli  
220 via pictorial manikin scales [Bradley and Lang, 1994] on a 9-point Likert Scale, whereas  
221 the value 0 indicated a neutral stimulus evaluation (Valence: -4 unpleasant, 4 pleasant;  
222 Arousal: -4 relaxing, 4 upsetting).

## 223 **2.6 Behavioral Analysis**

224 Behavioral data was analyzed with the statistic software R (R version 3.4.2; R Foundation  
225 for Statistical Computing, Austria) and the packages "psych", "emmeans", "sjstats" and  
226 "lme4". Linear mixed effect models were used to analyze tinnitus loudness ratings and  
227 stimuli evaluation (valence, arousal) separately. The following predictors were tested for  
228 the model fitting procedure of tinnitus loudness ratings: condition (stimuli, compare sec-  
229 tion 2.5), time (0sec, 30sec, 60sec, 90sec, 120sec, 150sec, 180sec towards stimulation  
230 offset), tinnitus bilaterality (yes/no), sex (male/female), tinnitus duration and stimuli posi-  
231 tion in the auditory stimulation sequence. The predictors condition, gender and tinnitus  
232 duration were tested for the model fitting procedure of stimuli evaluation data.

233 Other potential predictors such as tinnitus loudness (dB), MML, SL or HL were not  
234 included in the model fitting procedure, since they were experimentally controlled e.g., by  
235 the creation of tailored stimuli. Participant (id) was considered as a random effect in all



236 model fitting procedures. In order to identify the model with the best fit for the data, the  
237 step function of the lme4 package was deployed. Thereby, a backward elimination of non  
238 significant predictors as well as a forward addition of significant predictors is conducted  
239 by comparing the models with Likelihood Ratio Tests [Harrison et al., 2018]. Marginal  
240 (variance of the predictors) and conditional (variance of predictor and random effect)  $R^2$   
241 were computed to provide the amount of the explained variance of the respective model  
242 [Nakagawa et al., 2017]. For each final model, fixed effects were examined via Expected  
243 Mean Square Approach. Potential differences in tinnitus loudness and stimuli evaluation  
244 within predictors were analyzed with post-hoc Tukey-tests. Analysis of descriptive differ-  
245 ences between HL and LDL between the left and right ear were tested by the means of  
246 two-sample t-tests. Normal distribution (Shapiro-Wilk-Test) and homoscedasticity (F-test)  
247 were examined and if violated, non-parametric testing with independent sample Mann-  
248 Whitney U-tests were conducted. To evaluate effect size of significant differences, Co-  
249 hen's d was calculated. The level of statistical significance was set to  $p \leq .05$  for all  
250 analyses.

## 251 **2.7 Electrophysiological data acquisition and analysis**

### 252 **2.7.1 EEG recording**

253 EEG data was recorded with a BrainAmp DC system, EasyCap electrode cap with 64  
254 electrodes, and Brain Vision Recorder 1.20 software (Brain Products GmbH, Germany).  
255 The sampling rate was 500 Hz and electrodes were referenced to FCz during recording.  
256 Impedances were kept below 10k $\Omega$ .

### 257 **2.7.2 Preprocessing**

258 Raw EEG data was preprocessed with a custom-built semi-automatic pipeline using the  
259 Fieldtrip toolbox [Oostenveld et al., 2011] in Matlab (Matlab R2017a; Mathworks, USA).  
260 EEG data was filtered between 0.5 Hz and 45 Hz with a 4th order Butterworth bandpass  
261 filter.

262 Hereafter, an independent component analysis (ICA, fastICA <http://research.ics.aalto.fi/ica/fastica/index.shtml>) was used to identify and remove components with  
263 horizontal and vertical eye movement. Noisy or aberrant channels were interpolated us-  
264 ing weighted neighbors. Neighboring channels were defined via a triangulation of 2D  
265 sensor position projection and channels identified for interpolation were replaced with the  
266 mean of neighboring sensors. In a next step, average referencing was performed and  
267 the recording reference electrode FCz was added as a data channel. In order to control  
268 for noisy channels introduced by the rating procedure of the post stimulation conditions,  
269

270 posterior (Iz, TP9, TP10) as well as frontal channels (FPz, FP1, FP2, AF3, AF4, AF7,  
271 AF8) were discarded from subsequent analyses steps. Data was then segmented into  
272 2 seconds segments. All segments during which participants rated the loudness of their  
273 tinnitus were rejected. Additionally, one segment before and after the rating was excluded  
274 as well. Segments with remaining artifacts were rejected with combined automatic identi-  
275 fication via a z-score ( $\mu\text{V}$ ) threshold of  $-2/ +2$  and visual inspection in a final step. Average  
276 number of valid segments was different ( $U = 1970.50$ ,  $p = .001$ ) between pre ( $M = 78.93$ ,  
277  $SD = 6.48$ ) and post ( $M = 60.37$ ,  $SD = 6.19$ ) acoustic stimulation.

### 278 **2.7.3 EEG analysis**

279 **Power analysis - whole group** Frequency power spectra of pre and post auditory stim-  
280 ulation datasets per subject and condition (compare 2.5) were calculated using multitaper  
281 frequency transformation (mtmfft) and a hanning window with a spectral smoothing of 1  
282 Hz. Next, grand averages were created for pre and post stimulation datasets per condition  
283 by computing power spectra averages across all valid segments and all subjects.

284 Potential changes in EEG power spectra were analyzed with a  $2 \times 3$  repeated mea-  
285 surement ANOVA and the within subject factors time (pre, post) and condition (WN, IBP,  
286 IBS), which was implemented in Fieldtrip. The main effects for time and condition were  
287 tested with paired two-sided t-tests via non-parametric cluster-based permutation tests  
288 with 10.000 iterations. In order to test for an interaction effect of time and condition, a  
289 dependent samples multivariate ANOVA was conducted using a non-parametric cluster-  
290 based permutation test with 10.000 iterations as well. We were primary interested in an  
291 interaction effect of time and condition. In case of a significant time  $\times$  condition interac-  
292 tion, effects were followed up using post-hoc contrasts. Pre vs. post contrast per condition  
293 were analyzed with dependent samples t-tests, whereas potential differences in stimuli-  
294 induced power spectra changes from pre to post stimulation as well as post stimulation  
295 differences (inter-stimulus contrasts), were contrasted via independent samples t-tests  
296 using non-parametric cluster-based permutation test as described above.

297 Additionally, Pearson correlations between post stimulation power spectra and pre-  
298 post power spectra differences with averaged tinnitus loudness ratings (over all 7 time  
299 points) as well as directly after stimulation offset (T0) were computed via cluster-based  
300 permutation tests. Significance level was set to  $p \leq .05$  for all EEG analyses and  $p < 0.1$   
301 was defined as a statistical trend. Significant clusters were defined as a minimum of two  
302 significant neighboring channels for all analysis. For the purpose of interpretation, EEG  
303 frequency bands were defined as follows: delta 1-4 Hz, theta 5-7 Hz, alpha 8-12 Hz, beta  
304 13-29 Hz, gamma 30-45 Hz.

305 **Power analysis - responder** Furthermore, we compared frequency power spectra of  
306 participants who exhibited RI with those who did not experience RI after auditory stim-  
307 ulation. For this purpose RI was defined as  $\leq 50\%$  of tinnitus loudness directly after  
308 stimulation offset resulting in a subset of  $n = 12$  further indicated as responders. Within  
309 this subgroup of responders,  $n = 5$  participants each, responded to a stimulation with  
310 WN or IBP, whereas only  $n = 2$  participants reported RI after a stimulation with IBS. A  
311 second subgroup of participants without RI (non-responders) were matched to respon-  
312 ders according to the following criteria: gender; mean HL; age and absence of RI (tinnitus  
313 loudness of  $\geq 100\%$  after stimulation offset) in the same stimulus type as matched patient  
314 exhibited RI in responders group. Sample characteristics for both subgroups can be seen  
315 from table 2. Associations of categorical variables with stimulation response (responder  
316 or non-responder) were analyzed with  $\chi^2$ -tests or Fisher's exact tests if cell frequencies  
317 were below 5. Differences in numerical variables between the two subgroups were an-  
318 alyzed by two-sample t-tests. In case of violated statistical assumptions, Mann-Whitney  
319 U-tests were performed. Significance levels were set to  $p \leq .05$  and a statistical trend  
320 was defined as  $p < 0.1$ .

321 Power spectra for pre and post auditory stimulation EEG datasets were averaged over  
322 all subjects within the respective subgroup (responders and non-responders). Analysis  
323 were conducted using normalized EEG datasets by dividing power spectra for each single  
324 frequency through the mean power of the entire frequency spectrum.

325 Illustrated power spectra per frequency were transformed according to  $10 * \log_{10}(x)$ .  
326 EEG power spectra were analyzed with a  $2 \times 2$  repeated measures ANOVA and the factors  
327 time (pre, post) and group (responders, non-responders). The main effects for time and  
328 group were evaluated with dependent sample respectively independent sample t-tests  
329 according to the same approach as already described in the power analysis section for  
330 the whole group. Likewise, a potential interaction effect of time and group was analyzed  
331 with an independent samples t-test.

332 In the case of a significant interaction effect, post-hoc dependent samples t-tests  
333 for pre vs. post within subgroup contrast and independent samples t-tests for between  
334 subgroup contrast (responders vs. non-responders) separated for pre and post stimula-  
335 tion measurements are conducted. Regardless of an observed interaction effect, an ex-  
336 ploratory contrast of post stimulation power spectra differences between responders and  
337 non-responders is performed. Equal to the whole group analysis, Pearson correlations  
338 were calculated with cluster-based permutation tests for post stimulation power spectra  
339 and pre-post power spectra differences with averaged tinnitus loudness ratings or rather  
340 directly after stimulation offset (T0). Additionally, a correlation of post stimulation power  
341 spectra and pre-post power spectra differences with tinnitus loudness rated via VAS (%)  
342 was computed.

343 In order to explore differences in cortical alpha variability between responders and  
344 non-responders a coefficient of variance was calculated by dividing the standard deviation  
345 of the alpha frequency power (8-12 Hz) by its mean power.

346 **Source space analysis** Source localization of frequency data was performed using a  
347 standard boundary element headmodel [Oostenveld et al., 2003] and the dynamic imag-  
348 ing of coherent sources algorithm optimized for EEG frequency data (Dynamical Imaging  
349 of Coherent Sources , [Groß et al., 2001]). Inter-subgroup source contrasts (responders  
350 vs. non-responders; responders vs. non-responders post stimulation) of peak frequen-  
351 cies received from sensor-level cluster analysis (maximum value) were analyzed via non-  
352 parametric cluster-based permutation tests with 10.000 iterations using normalized EEG  
353 datasets. Normalization procedure was identical to the sensor level analysis.

## 354 **3 Results**

### 355 **3.1 Sample characteristics**

356 Table 1 summarizes the descriptive statistics and tinnitus-related questionnaire scores of  
357 the present sample. In the majority of participants, tinnitus was perceived bilaterally ( $n =$   
358 32) and featured loudness fluctuations ( $n = 24$ ). The possibility to mask their perceived  
359 tinnitus was reported by  $n = 31$  participants. Moreover,  $n = 4$  participants claimed to  
360 be musicians and the average duration of tinnitus perception was 111.04 months ( $SD =$   
361 72.90).

362 Stimulation with either WN, IBP and IBS resulted in  $n = 12$  responders, who showed  
363 RI with at least one stimulus type.

364 A weak association of stimulation response (responders or non-responders) and tinni-  
365 tus maskability (yes, no, don't know) was found with the group of responders exhibiting no  
366 participant who reported an absence of tinnitus maskability (cf. table 2). Statistical test-  
367 ing for differences between the subgroups of responders and non-responders revealed  
368 differences in terms of tinnitus duration, MML and questionnaire data with the group of  
369 responders showing shorter tinnitus duration ( $U = 26.00$ ,  $p = .008$ ,  $d = 1.135$ ), lower MML  
370 ( $U = 28.00$ ,  $p = .012$ ,  $d = 1.168$ ) as well as lower sum scores in TQ ( $U = 14.50$ ,  $p < .001$ ,  
371  $d = 1.159$ ), THI ( $t_{(19,71)} = -3.30$ ,  $p = .004$ ,  $d = 1.249$ ) and GUF ( $U = 28.50$ ,  $p = .012$ ,  $d =$   
372 1.137). Likewise, responders reported lower values in subjective measurements of tinni-  
373 tus awareness ( $U = 26.50$ ,  $p = .008$ ,  $d = 1.126$ ), loudness ( $U = 22.50$ ,  $p = .004$ ,  $d = 1.494$ )  
374 and bothersome ( $U = 34.00$ ,  $p = .029$ ,  $d = .931$ ) as indicated by VAS (in %). Detailed sam-  
375 ple characteristics and statistical comparisons for the two subgroups are shown in table  
376 2.

### 377 **3.2 Audiometry and Tinnitometry**

378 Results from audiometric assessment and tinnitus matching are outlined in table 1 as well  
379 as illustrated in figure S1. The investigated sample featured a mean tinnitus frequency of  
380 6251.09 Hz ( $SD = 2811.38$ ), whereas the average tinnitus loudness was 51.38 dB SPL  
381 ( $SD = 16.05$ ). Initial perception of the individual tinnitus pitch (SL) appeared at a mean  
382 volume level of 47.58 dB ( $SD = 17.49$ ). Mann-Whitney U-tests found no differences with  
383 respect to HL ( $U = 941.50$ ,  $p = .569$ ) and LDL ( $U = 199.50$ ,  $p = .361$ ) between the left and  
384 the right ear.

### 385 **3.3 Acoustic Stimulation**

386 Table S1 lists the descriptive statistics for tinnitus loudness ratings for each stimuli on  
387 average as well as time point T0. Tinnitus suppression time curves, including all seven  
388 time points, are illustrated in figure 2 for each stimuli.

389 Model fitting procedure of behavioural data was able to identify the following model  
390 with the best fit for the data:  $response \sim condition + (1 | id)$ . Table S2 lists detailed  
391 results of the model fitting proceeding. A significant effect of condition was observed (cf.  
392 table S3). Succeeding post-hoc contrasts found differences between stimulus WN vs. IBS,  
393 as well as IBP vs. IBS (cf. table 3). A potential confounding caused by the position of  
394 the stimuli in the acoustic stimulation sequence could be excluded, since position did not  
395 appear as a significant predictor in the final model.

### 396 **3.4 Stimulus evaluation**

397 Stimulus evaluation outcomes in terms of valence and arousal can be seen from table  
398 S4 and figure S2. Model  $response \sim condition + (1 | id)$  was identified to have the best  
399 fit for the valence data with condition as a significant fixed effect (cf. tables S5 and S6).  
400 Post-hoc tests were able to reveal differences for valence evaluations of stimuli WN vs.  
401 IBS and also IBP vs. IBS as can be seen from table S7. Subsequent model was identified  
402 by our model fitting approach for arousal data:  $response \sim condition + gender + (1 | id)$   
403 (cf. table S5). Fixed effect testing revealed significant effects for condition and gender (cf.  
404 table S6). Post-hoc analysis showed differences between stimuli IBP and IBS as well as  
405 male and female participants (cf. table S7).

### 406 **3.5 Electrophysiology**

407 Results of whole sample EEG power spectra analysis are outlined in table 4. A significant  
408 main effect of time was observed, indicating higher spectral power for 1-7 Hz and 26-45  
409 Hz plus lower spectral power for 7-28 Hz after auditory stimulation. Further, a significant  
410 interaction of condition and time was found in the frequency spectra 1-7 Hz and 36-45  
411 Hz. Succeeding post-hoc contrasts revealed higher power in lower frequencies towards  
412 stimulation across all stimuli (WN: 1-7 Hz; IBP: 1-6 Hz; IBS: 1-6 Hz) as well as higher  
413 gamma activity after a stimulation with IBP (32-45 Hz) and IBS (37-45 Hz). A power de-  
414 crease following IBS stimulation was found for the frequency cluster 11-19 Hz. In addition,  
415 statistical trends towards power reductions in the frequency clusters 10-12 Hz and 14-19  
416 Hz were observed for pre-post comparisons of stimulus WN. Differences between the ap-  
417 plied types of stimuli with respect to pre-post power spectra changes or post stimulation  
418 power spectra were not detected.



419 Electrodes within frequency clusters as outlined in table 4 can be found in the supple-  
420 mental material in table S8 grouped by brain areas.

421 No correlations were found on the cluster level for post stimulation EEG power or  
422 pre-post power spectra changes with averaged tinnitus loudness ratings or rather tinnitus  
423 loudness ratings immediately after stimulation end (T0) for any of the used stimuli.

424 Table 5 provides the results obtained from the responder EEG power spectra analy-  
425 sis (compare section 2.7.3). A significant main effect of time was observed, indicating  
426 a power reduction from pre to post stimulation in the frequency cluster 6-32 Hz for re-  
427 sponders as well as non-responders. Likewise, a significant effect of group demonstrates  
428 lower power in higher frequency ranges (22-45 Hz;  $t(\max) = -4.06$ , over electrode P5 at  
429 31 Hz; cf. figure 3 A and B) as well as a statistical trend towards higher power in the alpha  
430 frequency range (7-12 Hz;  $t(\max) = 4.35$ , over electrode F4 at 9 Hz; cf. figure 3 A and B)  
431 for the subgroup of responders. There was no significant interaction of time and group.  
432 Electrodes within frequency cluster presented in table 5 can be found in table S9 in the  
433 supplemental material.

434 Coefficient of variance calculation exclusively for the alpha frequency band (8-12 Hz)  
435 exposed a higher variation in frequency band power for the subgroup of responders (re-  
436 sponders: 61.04%; non-responders: 50.03%)

437 Correlations of EEG power towards stimulation or pre-post power spectra changes  
438 on the cluster level with subjective tinnitus ratings for the group of responders showed  
439 no significant results for mean tinnitus loudness or tinnitus loudness at T0. Further no  
440 correlation with tinnitus loudness rated via VAS (%) was observed.

441 Subsequent exploratory analysis of post stimulation power spectra differences be-  
442 tween responders and non-responders, exhibited increased activity in the frequency clus-  
443 ter 5-17 Hz in the subgroup of responders ( $t(\max) = 4.94$ , over electrode F4 at 9 Hz; cf.  
444 table 5 and figure 4 A and B).

445 Projecting peak frequencies of sensor-level power differences of responders and non-  
446 responders contrasts in source space exposed differences solely for 9 Hz ( $t(\text{cluster}) =$   
447  $13.07$ ,  $p = .004$ ) with maximum differences ( $t(\max) = 2.70$ ) localized in the right inferior  
448 temporal gyrus (MNI: 60 -10 -30) shown in figure 3C). However, no difference at the peak  
449 frequency 31 Hz could be observed in source space. Source localization of the peak  
450 frequency received from sensor-level contrast between responders and non-responders  
451 post acoustic stimulation exhibited differences at the frequency of 9 Hz ( $t(\text{cluster}) = 31.95$ ,  
452  $p = .032$ ) localized in the right superior temporal gyrus (MNI: 40 -30 10) presented in figure  
453 4C.

## 454 **4 Discussion**

455 The main objective of the present study was to investigate the effect of different types of  
456 noise stimuli on short-term tinnitus suppression and corresponding electrophysiological  
457 brain activity. Moreover, we wanted to elucidate if electrophysiological changes are a  
458 function of tinnitus loudness ratings and if differential activation patterns arise from the  
459 different stimuli putatively triggering RI or lateral inhibition, respectively. Finally, we aimed  
460 at examining potential differences in ongoing brain activity between responders and non-  
461 responders. To the best of our knowledge, this presentation of notch- and bandpass-  
462 filtered WN sounds is novel in its application in tinnitus research. Similarly, we are the  
463 first group which elucidated neurophysiological differences between acoustic stimulation  
464 responders and non-responders. In the following, the results of our study are thus critically  
465 discussed in the light of current knowledge and with respect to future research outlook.

### 466 **4.1 Behavioral results**

467 The behavioral analysis demonstrate similar suppression patterns as past studies in this  
468 field with only a subset of the study population reporting a considerable tinnitus loudness  
469 reduction after acoustic stimulation. On a group level all of the used stimuli induced short-  
470 term tinnitus suppression. Contrary to our hypothesis IBS appeared to produce the fewest  
471 reduction in tinnitus loudness rating, whereas IBP resulted in the strongest suppression  
472 pattern.

473 A potential explanation for this difference might derive from the ability of IBP/ WN  
474 in stimulating a broader range of frequencies around the ITF leading to a reduction of  
475 neural response gain and tinnitus-related hyperactivity and as a result facilitating short-  
476 term tinnitus suppression (cf. Schaeffe et al. [2010]), whereas suppressing effects of IBS  
477 via lateral inhibition might only appear after long-term application.

478 However, it is also possible that so called feed-forward inhibition is responsible for the  
479 superiority of stimuli containing signal in frequency ranges affected by hearing loss (cf.  
480 Roberts [2007]; Roberts et al. [2010]).

481 These explanations remain highly speculative and currently we are not able to pro-  
482 vide a suitable explanation for these observed differences. Interestingly, stimulus IBP was  
483 evaluated with the lowest tolerability as indicated by the highest arousal and lowest va-  
484 lence ratings. This finding is contrary to one of our previous experiments which reports  
485 low arousal and high valence ratings for IBP [Schoisswohl et al., 2019].

486 Generally, about 50 to 90% of the studied individuals report some level of tinnitus  
487 suppression after acoustic stimulation (e.g., [Neff et al., 2017; Schoisswohl et al., 2019;  
488 Fournier et al., 2018; Kahlbrock and Weisz, 2008; Sedley et al., 2012]). Given the skewed



489 distribution of RI responses on the group level in previous and this study as well as the  
490 need for a reliable threshold for strong tinnitus suppression, we opted to define a re-  
491 duction in tinnitus of 50% after acoustic stimulation as the threshold for the responder  
492 classification akin to [Kahlbrock and Weisz, 2008]. Applying this threshold, we can re-  
493 port an absolute number of 12 responders (with any stimulus type) out of 45 participants  
494 (26.67% responder rate) which is comparable to relative numbers reported by Kahlbrock  
495 and Weisz [2008] (26% responder rate), but below the quantity of responders reported by  
496 King et al. [2020] (56.67% responder rate; the threshold for RI in this study is currently  
497 unknown due to publication status).

## 498 **4.2 Electrophysiology**

499 Since only a handful of studies evaluated neural activity during RI, no specific hypothe-  
500 ses were generated about oscillatory changes from pre to post stimulation. In light of  
501 past neurophysiological research and the assumptions that tinnitus is accompanied by  
502 abnormal delta, alpha and gamma activity [Weisz et al., 2005, 2007a; Adjajian et al.,  
503 2012; Moazami-Goudarzi et al., 2010; Balkenhol et al., 2013; van der Loo et al., 2009;  
504 Ashton et al., 2007] as well as a putative brief inversion of altered spontaneous brain  
505 activity during RI [Kahlbrock and Weisz, 2008], it can be supposed that observed group-  
506 level changes in tinnitus loudness (RI) are also reflected in electrophysiological measures.  
507 Namely, a reduction in delta and gamma and an increase in alpha power spectra from pre  
508 to post stimulation is to be expected given these assumptions.

## 509 **4.3 Whole group analysis**

510 Analysis of whole group pre-post stimulation changes in ongoing brain activity revealed  
511 increases in the delta, theta and gamma frequency range as well as decreases in alpha  
512 and beta frequency bands. This increase in low frequency activity is in direct contrast  
513 to past observations, which report a reduction of delta and theta power spectra during  
514 RI in accordance with the current neurophysiological models for tinnitus [Kahlbrock and  
515 Weisz, 2008; Sedley et al., 2012, 2015]. In contrast, an earlier study using neuromagnetic  
516 measures in a single subject during short-term tinnitus suppression likewise reports an  
517 enhancement of low frequency activity [Kristeva-Feige et al., 1995].

518 Gamma band activity was suggested to represent a spontaneous brain activity pattern  
519 related to the actual tinnitus perception [Weisz et al., 2007a], therefore it is assumed that  
520 during a potential suppression of tinnitus after acoustic stimulation, activity in the gamma  
521 band will be suppressed. The current findings revealed an increase in gamma power  
522 after auditory stimulation, similar to findings from Sedley et al. [2015, 2012]; King et al.

523 [2020], who observed an increase in gamma band activity during RI. Consistent with the  
524 current literature, we observed a decrease in alpha frequency band power from pre to  
525 post stimulation [Kahlbrock and Weisz, 2008; Sedley et al., 2015]. However, a recent  
526 study was able to demonstrate an increase in alpha frequency band power during RI in  
527 accordance with the given neurophysiological models in tinnitus [King et al., 2020].

528 No relationship of pre-post power spectra changes, neither with tinnitus loudness rat-  
529 ings averaged over all time points nor directly after stimulation offset was observed in  
530 our data. Past neurophysiological research was not able to produce consistent findings  
531 in terms of correlations with behavioral measures of tinnitus respectively RI (e.g., inten-  
532 sity, loudness). Besides observed positive correlations of low and high frequency activity  
533 [Sedley et al., 2012; Balkenhol et al., 2013; van der Loo et al., 2009] or alpha activity with  
534 tinnitus intensity [Sedley et al., 2015; Meyer et al., 2014], the current findings are in ac-  
535 cordance with other studies which report an absence of any relationship [Adjajian et al.,  
536 2012; Pierzycki et al., 2016; Kahlbrock and Weisz, 2008]. In consideration of missing  
537 correlations as well as power spectra changes in conflict with current neurophysiologi-  
538 cal models for tinnitus, we suggest that the present findings do not indicate oscillatory  
539 patterns related to tinnitus loudness suppression, rather constitute a tinnitus-unspecific  
540 neurophysiological reaction to an external acoustic stimulus.

541 Oscillatory activity in the alpha frequency range is supposed to be relevant for in-  
542 hibitory processes of the brain [Klimesch et al., 2007], thus a sound stimulation exceed-  
543 ing the individual tinnitus loudness level produces excitation and consequently alpha de-  
544 creases. It has already been shown, that spontaneous activity in the alpha (6-12 Hz) and  
545 beta (~20 Hz) frequency bands desynchronize after sound stimulation (for an overview see  
546 Weisz et al. [2011]). Likewise, gamma band activity (30-45 Hz; 80-100 Hz), which is as-  
547 sociated with cortical activation like attention or perception, was observed to be enhanced  
548 after the presentation of sound stimuli [Crone et al., 2001; Joliot et al., 1994] comparable  
549 to the present and recent findings [King et al., 2020].

550 In order to distinguish spontaneous brain activity related to tinnitus suppression from  
551 tinnitus-unspecific neurophysiological consequences to a sound stimulation, future re-  
552 search should not only compare acoustic stimulation responders and non-responders (RI  
553 vs. absence of RI) but also strive for a comparison with healthy control groups.

#### 554 **4.4 Responder analysis**

555 Another objective of this study was to compare acoustic stimulation responders with non-  
556 responders, in order to point out potential differences in regards to ongoing brain activity.  
557 To the best of our knowledge this is the first study, which compares oscillatory activity of  
558 acoustic stimulation responders and non-responders.

559 Interestingly, we observed reduced gamma band activity and a trend for enhanced  
560 alpha activity (peak frequency of 9 Hz localized in the right inferior temporal gyrus; BA  
561 20) for the group of responders in contrast to non-responders. This result may corrobo-  
562 rate the premise that gamma might be related to tinnitus perception [van der Loo et al.,  
563 2009; De Ridder et al., 2015a; Ashton et al., 2007; Weisz et al., 2007b]. Given the fact,  
564 that responders generally reported their perceived tinnitus loudness level lower than non-  
565 responders, the question arises if the perceived tinnitus loudness rated via VAS can be  
566 associated with ongoing brain activity e.g., lower tinnitus loudness related to reduced  
567 gamma power or enhanced alpha. Yet, a respective correlation analysis failed to show an  
568 association.

569 As already shown by Schlee et al. [2014] tinnitus sufferers exhibited a blunted alpha  
570 peak and more importantly reduced alpha variability (8-10 Hz). This finding could be  
571 reflected by our data in a similar way as non-responders had a lower alpha peak and  
572 lower alpha variability (8-12 Hz). In further support for this argumentation, the data of the  
573 former study as well as our present findings show longer tinnitus duration for subjects with  
574 reduced alpha power, whereas we assume that these insights from case-control contrasts  
575 can be applied to the responder analysis at hand.

576 The observed reduction in gamma power may be interpreted along similar veins as  
577 the findings in alpha power by applying insights from case-control studies. Responders  
578 with a less chronified and intense tinnitus in our study are thus comparable to healthy  
579 controls in some case-control designs with reported lower gamma power values [Ashton  
580 et al., 2007; Vanneste et al., 2011]. In further analogy, our findings of diminished gamma  
581 band activity together with a decrease in tinnitus loudness for the subgroup of responders  
582 can be linked to observations of past studies, namely a positive correlation of gamma  
583 with tinnitus loudness [van der Loo et al., 2009; De Ridder et al., 2015a; Balkenhol et al.,  
584 2013].

585 We theorize that this trend for blunted alpha as well as lower gamma activity may be  
586 indicative of a trait as a consequence of tinnitus chronification.

587 A related observation was made by Neff et al. [2019a] where active listening to tinnitus  
588 and consequential increase in tinnitus intensity did not lead to any neural alterations,  
589 which fits the reasoning about a trait-like neural representation of chronified tinnitus.

590 However, it is also possible that this pattern of reduced gamma and enhanced alpha  
591 activity represent a genuine neural trait related to acoustic stimulation response more  
592 specifically the possibility to induce RI in tinnitus sufferers.

593 Our exploratory analysis of post acoustic stimulation contrasts revealed higher spectral  
594 power in the theta, alpha and beta frequency range with a peak in the alpha band (9 Hz)  
595 localized in the right superior temporal gyrus (BA 41) in acoustic stimulation responders.

596 This increased alpha in auditory fields is in line with our hypothesis of a brief inversion

597 of altered oscillatory power during RI and is consistent with past research examining dis-  
598 parities between tinnitus and healthy controls (compare section 1). Notably, this supports  
599 our assumptions about responders and related trait-like neural signatures of tinnitus in  
600 that it surmises that only responders can exhibit neural responses which are specific to  
601 RI induced by acoustic stimulation.

602 Finally, a lack of correlations between loudness ratings and ongoing brain activity in  
603 the present study does not allow for a conclusive interpretation with regards to tinnitus.  
604 Past studies examining correlates of tinnitus suppression and neural activity have been  
605 able to demonstrate a relationship of low and high frequency activity with tinnitus intensity  
606 Sedley et al. [2015, 2012]. Nevertheless Kahlbrock and Weisz [2008] were not able to  
607 demonstrate a correlation of tinnitus suppression and ongoing neural activity in agreement  
608 with the present findings.

609 To further investigate these observed differences it is recommended to optimize future  
610 study designs with respect to a parametric analysis of tinnitus duration and RI-related  
611 neural activity.

## 612 **4.5 Limitations**

613 Our study has several limitations which might be informative for future research in the  
614 specific subfield of acoustic stimulation and general research in tinnitus.

615 No correlations between neurophysiological changes and changes in behaviorally as-  
616 sessed self-report tinnitus loudness were found in our data. Given the narrow and skewed  
617 distribution of the behavioral data and the consequential arbitrary choice of a RI thresh-  
618 old of 50% for the responder group contrast, correlation analysis might neither way be  
619 informative with the current data. This negative result is in line with the former study of  
620 Kahlbrock and Weisz [2008]. Moreover, full and prolonged RI could only be studied in  
621 a small subset of the participants. Finally, heterogeneity of tinnitus loudness suppres-  
622 sion curves between participants and the general low reliability and validity of tinnitus  
623 self-report data may further contribute to these absent findings.

624 As in many previous studies, it is challenging to recruit a large enough study sample  
625 from the locally available tinnitus population for the extensive experimental procedures.  
626 Additionally, tinnitus suppression responses, especially the parameters of RI depth as  
627 well as duration, can not be properly assessed in established screening procedures. This  
628 selection bias is hard to come by and potentially distorts results. Future studies could  
629 thus profit from internet-based prescreening. Beyond that, multi-center studies could help  
630 to further increase the validity of results aside from increasing the sample size.

## 631 **5 Conclusions**

632 The main goal of the current study was to unveil the oscillatory signature of RI and see  
633 how this relates to established neurophysiological models of tinnitus. In contrast to former  
634 studies, we used an extended set of modified noise stimuli targeting putatively differential  
635 neural mechanisms (i.e., RI and lateral inhibition). Furthermore, we explicitly investigated  
636 responder profiles of RI. Similar to former studies, merely a quarter of tested participants  
637 exhibited pronounced RI.

638 Looking at the oscillatory signature of acoustic stimulation responders and non-responders,  
639 results are indicative of decreased gamma and increased alpha power for responders.  
640 These findings are in line with both the proposed models of SLIM and TCD, respectively.  
641 This observations might be indicative of trait-specific forms of oscillatory signatures in  
642 different subsets of the tinnitus population possibly related to acoustic tinnitus suppres-  
643 sion. In agreement with a potential transient reversal of tinnitus-specific abnormal ongoing  
644 brain activity over the course of tinnitus suppression, alpha power was enhanced in the  
645 group of responders after stimulation similarly compared to non-responders. Source lo-  
646 calization of the sensor-level differences emphasizes the involvement of auditory cortical  
647 systems. Given the lack of correlations between tinnitus loudness and oscillatory power in  
648 this study, which was also reported by former studies, results do not allow for a conclusive  
649 interpretation with respect to these models.

650 The identified tinnitus patient profile experiencing RI, which mainly features less tinni-  
651 tus chronification, could serve as a selection criterion to identify individuals for successful  
652 acoustic tinnitus suppression and putatively for acoustic treatments (e.g., treatment start  
653 in early stages of chronification).

654 Further research examining oscillatory activity during RI should strive for a healthy  
655 control group as well as control sounds not inducing RI in order to separate the neural  
656 signature of tinnitus suppression from tinnitus-unspecific neurophysiological effects.

## 657 **Declaration of interest**

658 The authors have no conflicts of interest to declare.

## 659 **Acknowledgments**

660 We are thankful to all participants for their time and patience and especially grateful to  
661 Susanne Staudinger for her help with the study management. Moreover, we thank Anita

662 Hafner and Bernhard Unsinn for their valuable support in data acquisition and study man-  
663 agement.

## 664 **Funding**

665 This study was conducted as part of the European School for Interdisciplinary Tinnitus  
666 Research (ESIT [Schlee et al., 2018]). SS received funding from the European Union's  
667 Horizon 2020 research and innovation program under the Marie Skłodowska- Curie grant  
668 (agreement number 722046). We furthermore thank the Swiss National Fund 'Early Post-  
669 doc Mobility' Grant P2ZHP1 174967 and to the University Research Priority Program 'Dy-  
670 namics of Healthy Aging' of the University of Zurich for supporting PN during the prepa-  
671 ration of the manuscript.



## References

- 672
- 673 Adjamian, P., Sereda, M., and Hall, D. A. (2009). The mechanisms of tinnitus: Perspec-  
674 tives from human functional neuroimaging. *Hear Res*, 253(1):15–31.
- 675 Adjamian, P., Sereda, M., Zobay, O., Hall, D. A., and Palmer, A. R. (2012). Neuromagnetic  
676 Indicators of Tinnitus and Tinnitus Masking in Patients with and without Hearing Loss.  
677 *J Assoc Res Otolaryngol*, 13(5):715–731.
- 678 Ashton, H., Reid, K., Marsh, R., Johnson, I., Alter, K., and Griffiths, T. (2007). High  
679 frequency localised “hot spots” in temporal lobes of patients with intractable tinnitus: A  
680 quantitative electroencephalographic (QEEG) study. *Neurosci Lett*, 426(1):23–28.
- 681 Balkenhol, T., Wallhäusser-Franke, E., and Delb, W. (2013). Psychoacoustic Tinnitus  
682 Loudness and Tinnitus-Related Distress Show Different Associations with Oscillatory  
683 Brain Activity. *PLoS One*, 8(1):e53180.
- 684 Basile, C., Fournier, P., Hutchins, S., and Hébert, S. (2013). Psychoacoustic Assessment  
685 to Improve Tinnitus Diagnosis. *PLoS One*, 8(12):e82995.
- 686 Bates, D., Mächler, M., Bolker, B., and Walker, S. (2015). Fitting linear mixed-effects  
687 models using lme4. *J Stat Softw*, 67(1):1–48.
- 688 Blaesing, L., Goebel, G., Floetzing, U., Berthold, A., and Kroener-Herwig, B. (2010).  
689 Hypersensitivity to sound in tinnitus patients: an analysis of a construct based on ques-  
690 tionnaire and audiological data. *Int J Audiol*, 49(7):518–526.
- 691 Bradley, M. M. and Lang, P. J. (1994). Measuring emotion: The self-assessment manikin  
692 and the semantic differential. *J Behav Ther Exp Psychiatry*, 25(1):49–59.
- 693 Brainard, D. H. (1997). The Psychophysics Toolbox. *Spat Vis*, 10(4):433–436.
- 694 Cederroth, C. R., Gallus, S., Hall, D. A., Kleinjung, T., Langguth, B., Maruotti, A., Meyer,  
695 M., Norena, A., Probst, T., Pryss, R., Searchfield, G., Shekhawat, G., Spiliopoulou, M.,  
696 Vanneste, S., and Schlee, W. (2019). Editorial: Towards an Understanding of Tinnitus  
697 Heterogeneity. *Front Aging Neurosci*, 11:53.
- 698 Cima, R. F. F., Maes, I. H., Joore, M. A., Scheyen, D. J. W. M., El Refaie, A., Baguley,  
699 D. M., Anteunis, L. J. C., van Breukelen, G. J. P., and Vlaeyen, J. W. S. (2012). Spe-  
700 cialised treatment based on cognitive behaviour therapy versus usual care for tinnitus:  
701 a randomised controlled trial. *Lancet*, 379(9830):1951–1959.

- 702 Croenlein, T., Langguth, B., Pregler, M., Kreuzer, P. M., Wetter, T. C., and Schecklmann,  
703 M. (2016). Insomnia in patients with chronic tinnitus: Cognitive and emotional distress  
704 as moderator variables. *J Psychosom Res*, 83:65–68.
- 705 Crone, N. E., Boatman, D., Gordon, B., and Hao, L. (2001). Induced electrocorticographic  
706 gamma activity during auditory perception. Brazier Award-winning article, 2001. *Clin*  
707 *Neurophysiol*, 112(4):565–582.
- 708 De Ridder, D., Congedo, M., and Vanneste, S. (2015a). The neural correlates of sub-  
709 jectively perceived and passively matched loudness perception in auditory phantom  
710 perception. *Brain Behav*, 5(5).
- 711 De Ridder, D., Vanneste, S., Langguth, B., and Llinas, R. (2015b). Thalamocortical Dys-  
712 rhythmia: A Theoretical Update in Tinnitus. *Front Neurol*, 6.
- 713 Eggermont, J. J. (2007). Pathophysiology of tinnitus. *Prog. Brain Res.*, 166:19–35.
- 714 Eggermont, J. J. and Roberts, L. E. (2012). The Neuroscience of Tinnitus: Understanding  
715 Abnormal and Normal Auditory Perception. *Front Syst Neurosci*, 6.
- 716 Eggermont, J. J. and Tass, P. A. (2015). Maladaptive Neural Synchrony in Tinnitus: Origin  
717 and Restoration. *Front Neurol*, 6.
- 718 Erlandsson, S. and Dauman, N. (2013). Categorization of tinnitus in view of history and  
719 medical discourse. *Int J Qual Stud Health Well-being*, 8(1):23530.
- 720 Feldmann, H. (1971). Homolateral and contralateral masking of tinnitus by noise-bands  
721 and by pure tones. *Audiology*, 10(3):138–144.
- 722 Feldmann, H. (1983). Time Patterns and Related Parameters in Masking of Tinnitus. *Acta*  
723 *Oto-Laryngologica*, 95(5-6):594–598.
- 724 Fournier, P., Cuvillier, A.-F., Gallego, S., Paolino, F., Paolino, M., Quemar, A., Londero, A.,  
725 and Norena, A. (2018). A New Method for Assessing Masking and Residual Inhibition  
726 of Tinnitus. *Trends Hear*, 22.
- 727 Fuller, T., Cima, R., Langguth, B., Mazurek, B., Vlaeyen, J. W., and Hoare, D. J.  
728 (2020). Cognitive behavioural therapy for tinnitus. *The Cochrane Database Syst Rev*,  
729 1(1):CD012614.
- 730 Galazyuk, A. V., Longenecker, R. J., Voytenko, S. V., Kristaponyte, I., and Nelson, G. L.  
731 (2019). Residual inhibition: From the putative mechanisms to potential tinnitus treat-  
732 ment. *Hear Res*, 375:1–13.



- 733 Galazyuk, A. V., Voytenko, S. V., and Longenecker, R. J. (2017). Long-Lasting forward  
734 Suppression of Spontaneous Firing in Auditory Neurons: Implication to the Residual  
735 Inhibition of Tinnitus. *J Assoc Res Otolaryngol*, 18(2):343–353.
- 736 Goebel, G. and Hiller, W. (1994). [The tinnitus questionnaire. A standard instrument for  
737 grading the degree of tinnitus. Results of a multicenter study with the tinnitus question-  
738 naire]. *HNO*, 42(3):166–172.
- 739 Green, D. M. (1993). A maximum-likelihood method for estimating thresholds in a yes-no  
740 task. *J Acoust Soc Am*, 93(4, Pt 1):2096–2105.
- 741 Groß, J., Kujala, J., Hämäläinen, M., Timmermann, L., Schnitzler, A., and Salmelin, R.  
742 (2001). Dynamic imaging of coherent sources: studying neural interactions in the hu-  
743 man brain. *Proceedings of the National Academy of Sciences*, 98(2):694–699.
- 744 Hallam, R. S., Jakes, S. C., and Hinchcliffe, R. (1988). Cognitive variables in tinnitus  
745 annoyance. *Br J Clin Psychol*, 27 ( Pt 3):213–222.
- 746 Harrison, X. A., Donaldson, L., Correa-Cano, M. E., Evans, J., Fisher, D. N., Goodwin,  
747 C. E., Robinson, B. S., Hodgson, D. J., and Inger, R. (2018). A brief introduction to  
748 mixed effects modelling and multi-model inference in ecology. *PeerJ*, 6:e4794.
- 749 Heller, A. J. (2003). Classification and epidemiology of tinnitus. *Otolaryngol Clin North*  
750 *Am*, 36(2):239–248.
- 751 Henry, J. A., Roberts, L. E., Ellingson, R. M., and Thielman, E. J. (2013). Computer-  
752 Automated Tinnitus Assessment: Noise-Band Matching, Maskability, and Residual In-  
753 hibition. *J Am Acad Audiol*, 24(6):486–504.
- 754 Hesse, G. (2016). Evidence and evidence gaps in tinnitus therapy. *GMS Curr Top Otorhi-*  
755 *nolaryngol Head Neck Surg*, 15:Doc04.
- 756 Joliot, M., Ribary, U., and Llinás, R. (1994). Human oscillatory brain activity near 40  
757 Hz coexists with cognitive temporal binding. *Proc Natl Acad Sci USA*, 91(24):11748–  
758 11751.
- 759 Kahlbrock, N. and Weisz, N. (2008). Transient reduction of tinnitus intensity is marked by  
760 concomitant reductions of delta band power. *BMC Biol*, 6(1):4.
- 761 King, R. O. C., Singh Shekhawat, G., King, C., Chan, E., Kobayashi, K., and Searchfield,  
762 G. D. (2020). The Effect of Auditory Residual Inhibition on Tinnitus and the Electroen-  
763 cephalogram. *Ear Hear*, Publish Ahead of Print.

- 764 Kleiner, M., Brainard, D., Pelli, D., Ingling, A., Murray, R., and Broussard, C. (2007). What's  
765 new in psyctoolbox-3. *Perception*, 36(14):1–16.
- 766 Kleinjung, T., Fischer, B., Langguth, B., Sand, P. G., Hajak, G., Dvorakova, J., and Eich-  
767 hammer, P. (2007). Validierung einer deutschsprachigen Version des Tinnitus Handicap  
768 Inventory. *Psychiat Prax*, 34(S 1):S140–S142.
- 769 Kleinjung, T. and Langguth, B. (2020). Avenue for Future Tinnitus Treatments. *Otolaryngol*  
770 *Clin North Am*, 53(4):667–683.
- 771 Klimesch, W., Sauseng, P., and Hanslmayr, S. (2007). EEG alpha oscillations: the  
772 inhibition-timing hypothesis. *Brain Res Rev*, 53(1):63–88.
- 773 Kristeva-Feige, R., Feige, B., Kowalik, Z., and Ross, B. (1995). Neuromagnetic activity  
774 during residual inhibition in tinnitus. *J Audiol Med*, 4(3):135–142.
- 775 Landry, E. C., Sandoval, X. C. R., Simeone, C. N., Tidball, G., Lea, J., and Westerberg,  
776 B. D. (2020). Systematic Review and Network Meta-analysis of Cognitive and/or Be-  
777 havioral Therapies (CBT) for Tinnitus. *Otol Neurotol*, 41(2):153–166.
- 778 Langguth, B., Goodey, R., Azevedo, A., Bjorne, A., Cacace, A., Crocetti, A., Del Bo, L.,  
779 De Ridder, D., Diges, I., Elbert, T., Flor, H., Herraz, C., Ganz Sanchez, T., Eichhammer,  
780 P., Figueiredo, R., Hajak, G., Kleinjung, T., Landgrebe, M., Londero, A., Lainez, M.  
781 J. A., Mazzoli, M., Meikle, M. B., Melcher, J., Rauschecker, J. P., Sand, P. G., Struve,  
782 M., Van de Heyning, P., Van Dijk, P., and Vergara, R. (2007). Consensus for tinnitus  
783 patient assessment and treatment outcome measurement: Tinnitus Research Initiative  
784 meeting, Regensburg, July 2006. *Prog. Brain Res.*, 166:525–536.
- 785 Langguth, B., Kreuzer, P. M., Kleinjung, T., and De Ridder, D. (2013). Tinnitus: causes  
786 and clinical management. *Lancet Neurol*, 12(9):920–930.
- 787 Leiner, D. J. (2016). SoSci Survey.
- 788 Li, J., Jin, J., Xi, S., Zhu, Q., Chen, Y., Huang, M., and He, C. (2019). Clinical efficacy  
789 of cognitive behavioral therapy for chronic subjective tinnitus. *American journal of oto-*  
790 *laryngology*, 40(2):253–256.
- 791 Llinás, R., Urbano, F. J., Leznik, E., Ramírez, R. R., and van Marle, H. J. F. (2005).  
792 Rhythmic and dysrhythmic thalamocortical dynamics: GABA systems and the edge  
793 effect. *Trends Neurosci*, 28(6):325–333.
- 794 Llinás, R. R., Ribary, U., Jeanmonod, D., Kronberg, E., and Mitra, P. P. (1999). Thalam-  
795 ocortical dysrhythmia: A neurological and neuropsychiatric syndrome characterized by  
796 magnetoencephalography. *Proc Natl Acad Sci USA*, 96(26):15222–15227.

- 797 Mazurek, B., Olze, H., Haupt, H., and Szczepek, A. J. (2010). The More the Worse: the  
798 Grade of Noise-Induced Hearing Loss Associates with the Severity of Tinnitus. *Int. J.*  
799 *Environ. Res. Public Health*, 7(8):3071–3079.
- 800 Meyer, M., Luethi, M. S., Neff, P., Langer, N., and Büchi, S. (2014). Disentangling Tinnitus  
801 Distress and Tinnitus Presence by Means of EEG Power Analysis. *Neural Plast*, 2014.
- 802 Moazami-Goudarzi, M., Michels, L., Weisz, N., and Jeanmonod, D. (2010). Temporo-  
803 insular enhancement of EEG low and high frequencies in patients with chronic tinnitus.  
804 QEEG study of chronic tinnitus patients. *BMC Neurosci*, 11.
- 805 Nakagawa, S., Johnson, P. C. D., and Schielzeth, H. (2017). The coefficient of determi-  
806 nation R<sup>2</sup> and intra-class correlation coefficient from generalized linear mixed-effects  
807 models revisited and expanded. *J R Soc Interface*, 14(134).
- 808 Neff, P., Hemsley, C., Kraxner, F., Weidt, S., Kleinjung, T., and Meyer, M. (2019a). Active  
809 listening to tinnitus and its relation to resting state EEG activity. *Neurosci Lett*, 694:176  
810 – 183.
- 811 Neff, P., Michels, J., Meyer, M., Schecklmann, M., Langguth, B., and Schlee, W. (2017).  
812 10 Hz Amplitude Modulated Sounds Induce Short-Term Tinnitus Suppression. *Front*  
813 *Aging Neurosci*, 9.
- 814 Neff, P., Zielonka, L., Meyer, M., Langguth, B., Schecklmann, M., and Schlee, W.  
815 (2019b). Comparison of Amplitude Modulated Sounds and Pure Tones at the Tinni-  
816 tus Frequency: Residual Tinnitus Suppression and Stimulus Evaluation. *Trends Hear*,  
817 23:2331216519833841.
- 818 Newman, C. W., Wharton, J. A., Shivapuja, B. G., and Jacobson, G. P. (1994). Rela-  
819 tionships among Psychoacoustic Judgments, Speech Understanding Ability and Self-  
820 Perceived Handicap in Tinnitus Subjects. *Int J Audiol*, 33(1):47–60.
- 821 Nondahl, D. M., Cruickshanks, K. J., Dalton, D. S., Klein, B. E. K., Klein, R., Schubert,  
822 C. R., Tweed, T. S., and Wiley, T. L. (2007). The impact of tinnitus on quality of life in  
823 older adults. *J Am Acad Audiol*, 18(3):257–266.
- 824 Norena, A., Micheyl, C., Chéry-Croze, S., and Collet, L. (2002). Psychoacoustic Char-  
825 acterization of the Tinnitus Spectrum: Implications for the Underlying Mechanisms of  
826 Tinnitus. *Audiol Neurotol*, 7(6):358–369.
- 827 Okamoto, H., Stracke, H., Stoll, W., and Pantev, C. (2010). Listening to tailor-made  
828 notched music reduces tinnitus loudness and tinnitus-related auditory cortex activity.  
829 *Proc Natl Acad Sci*, 107(3):1207–1210.

- 830 Oostenveld, R., Fries, P., Maris, E., and Schoffelen, J.-M. (2011). FieldTrip: Open Source  
831 Software for Advanced Analysis of MEG, EEG, and Invasive Electrophysiological Data.  
832 *Comput Intell Neurosci*, 2011:1–9.
- 833 Oostenveld, R., Stegeman, D. F., Praamstra, P., and van Oosterom, A. (2003). Brain  
834 symmetry and topographic analysis of lateralized event-related potentials. *Clinical neu-*  
835 *rophysiology*, 114(7):1194–1202.
- 836 Pantev, C., Okamoto, H., and Teismann, H. (2012). Music-induced cortical plasticity and  
837 lateral inhibition in the human auditory cortex as foundations for tonal tinnitus treatment.  
838 *Front Syst Neurosci*, 6.
- 839 Pierzycki, R. H., McNamara, A. J., Hoare, D. J., and Hall, D. A. (2016). Whole scalp  
840 resting state EEG of oscillatory brain activity shows no parametric relationship with  
841 psychoacoustic and psychosocial assessment of tinnitus: A repeated measures study.  
842 *Hear Res*, 331:101–108.
- 843 Reavis, K. M., Rothholtz, V. S., Tang, Q., Carroll, J. A., Djalilian, H., and Zeng, F.-G.  
844 (2012). Temporary Suppression of Tinnitus by Modulated Sounds. *J Assoc Res Oto-*  
845 *laryngol*, 13(4):561–571.
- 846 Roberts, L. E. (2007). Residual inhibition. In *Progress in Brain Research*, volume 166,  
847 pages 487–495. Elsevier.
- 848 Roberts, L. E., Eggermont, J. J., Caspary, D. M., Shore, S. E., Melcher, J. R., and  
849 Kaltenbach, J. A. (2010). Ringing Ears: The Neuroscience of Tinnitus. *J Neurosci*,  
850 30(45):14972–14979.
- 851 Roberts, L. E., Moffat, G., Baumann, M., Ward, L. M., and Bosnyak, D. J. (2008). Residual  
852 Inhibition Functions Overlap Tinnitus Spectra and the Region of Auditory Threshold  
853 Shift. *J Assoc Res Otolaryngol*, 9(4):417–435.
- 854 Roberts, L. E., Moffat, G., and Bosnyak, D. J. (2006). Residual inhibition functions  
855 in relation to tinnitus spectra and auditory threshold shift. *Acta Oto-Laryngologica*,  
856 126(sup556):27–33.
- 857 Schaette, R., Koenig, O., Hornig, D., Gross, M., and Kempner, R. (2010). Acoustic stim-  
858 ulation treatments against tinnitus could be most effective when tinnitus pitch is within  
859 the stimulated frequency range. *Hear Res*, 269(1-2):95–101.
- 860 Schecklmann, M., Vielsmeier, V., Steffens, T., Landgrebe, M., Langguth, B., and Klein-  
861 jung, T. (2012). Relationship between Audiometric Slope and Tinnitus Pitch in Tinnitus  
862 Patients: Insights into the Mechanisms of Tinnitus Generation. *PLoS One*, 7(4).

- 863 Schlee, W., Hall, D. A., Canlon, B., Cima, R. F. F., de Kleine, E., Hauck, F., Huber, A.,  
864 Gallus, S., Kleinjung, T., Kypraios, T., Langguth, B., Lopez-Escamez, J. A., Lugo, A.,  
865 Meyer, M., Mielczarek, M., Norena, A., Pfiffner, F., Pryss, R. C., Reichert, M., Re-  
866 quena, T., Schecklmann, M., van Dijk, P., van de Heyning, P., Weisz, N., and Cederroth,  
867 C. R. (2018). Innovations in Doctoral Training and Research on Tinnitus: The Euro-  
868 pean School on Interdisciplinary Tinnitus Research (ESIT) Perspective. *Front Aging*  
869 *Neurosci*, 9.
- 870 Schlee, W., Schecklmann, M., Lehner, A., Kreuzer, P. M., Vielsmeier, V., Poepl, T. B., and  
871 Langguth, B. (2014). Reduced Variability of Auditory Alpha Activity in Chronic Tinnitus.  
872 *Neural Plast*, 2014:1–9.
- 873 Schoisswohl, S., Arnds, J., Schecklmann, M., Langguth, B., Schlee, W., and Neff, P.  
874 (2019). Amplitude Modulated Noise for Tinnitus Suppression in Tonal and Noise-Like  
875 Tinnitus. *Audiol Neurotol*, 24(6):309–321.
- 876 Sedley, W., Gander, P., Kumar, S., Oya, H., Kovach, C., Nourski, K., Kawasaki, H.,  
877 Howard, M., and Griffiths, T. (2015). Intracranial Mapping of a Cortical Tinnitus System  
878 using Residual Inhibition. *Curr Biol*, 25(9):1208–1214.
- 879 Sedley, W., Teki, S., Kumar, S., Barnes, G. R., Bamiou, D.-E., and Griffiths, T. D. (2012).  
880 Single-subject oscillatory gamma responses in tinnitus. *Brain*, 135(10):3089–3100.
- 881 Trevis, K. J., McLachlan, N. M., and Wilson, S. J. (2016). Psychological mediators of  
882 chronic tinnitus: The critical role of depression. *J Affect Disord*, 204:234–240.
- 883 Tyler, R., Stocking, C., Secor, C., and Slattery, W. H. (2014). Amplitude Modulated S-  
884 Tones Can Be Superior to Noise for Tinnitus Reduction. *Am J Audiol*, 23(3):303.
- 885 van der Loo, E., Gais, S., Congedo, M., Vanneste, S., Plazier, M., Menovsky, T., Van de  
886 Heyning, P., and De Ridder, D. (2009). Tinnitus intensity dependent gamma oscillations  
887 of the contralateral auditory cortex. *PLoS One*, 4(10):e7396.
- 888 Vanneste, S., Heyning, P. V. d., and Ridder, D. D. (2011). Contralateral parahippocam-  
889 pal gamma-band activity determines noise-like tinnitus laterality: a region of interest  
890 analysis. *Neuroscience*, 199:481–490.
- 891 Vernon, J. A. and Meikle, M. B. (2003). Tinnitus: clinical measurement. *Otolaryngol Clin*  
892 *North Am*, 36(2):293–305.
- 893 Weidt, S., Delsignore, A., Meyer, M., Rufer, M., Peter, N., Drabe, N., and Kleinjung, T.  
894 (2016). Which tinnitus-related characteristics affect current health-related quality of life  
895 and depression? A cross-sectional cohort study. *Psychiatry Res*, 237:114–121.

- 896 Weisz, N., Dohrmann, K., and Elbert, T. (2007a). The relevance of spontaneous activity  
897 for the coding of the tinnitus sensation. In *Progress in Brain Research*, volume 166,  
898 pages 61–70. Elsevier.
- 899 Weisz, N., Hartmann, T., Müller, N., Lorenz, I., and Obleser, J. (2011). Alpha Rhythms in  
900 Audition: Cognitive and Clinical Perspectives. *Front Psychol*, 2.
- 901 Weisz, N., Moratti, S., Meinzer, M., Dohrmann, K., and Elbert, T. (2005). Tinnitus Percep-  
902 tion and Distress Is Related to Abnormal Spontaneous Brain Activity as Measured by  
903 Magnetoencephalography. *PLoS Med*, 2(6):e153.
- 904 Weisz, N., Müller, S., Schlee, W., Dohrmann, K., Hartmann, T., and Elbert, T. (2007b).  
905 The neural code of auditory phantom perception. *J. Neurosci*, 27(6):1479–1484.
- 906 Zenner, H.-P., Delb, W., Kroener-Herwig, B., Jaeger, B., Peroz, I., Hesse, G., Mazurek,  
907 B., Goebel, G., Gerloff, C., Trollmann, R., Biesinger, E., Seidler, H., and Langguth,  
908 B. (2017). A multidisciplinary systematic review of the treatment for chronic idiopathic  
909 tinnitus. *Eur Arch Otorhinolaryngol*, 274(5):2079–2091.
- 910 Zobay, O., Palmer, A. R., Hall, D. A., Sereda, M., and Adjajian, P. (2015). Source  
911 Space Estimation of Oscillatory Power and Brain Connectivity in Tinnitus. *PLoS One*,  
912 10(3):e0120123.



913 **6 Tables**

|                                            |                   |           |            |            |
|--------------------------------------------|-------------------|-----------|------------|------------|
| N (female)                                 | 45 (14)           |           |            |            |
| Tinnitus side (left/ right/ bilateral)     | (5/ 8/ 32)        |           |            |            |
| Tinnitus loudness fluctuation (yes/ no)    | (24/ 21)          |           |            |            |
| Tinnitus maskability (yes/ no/ don't know) | (31/ 5/ 9)        |           |            |            |
| Musician (yes/ no)                         | (4/ 41)           |           |            |            |
|                                            | <b>M ± SD</b>     | <b>Md</b> | <b>Min</b> | <b>Max</b> |
| Age (years)                                | 52.29 ± 11.81     | 55.00     | 23.00      | 69.00      |
| Tinnitus duration (months)                 | 111.04 ± 72.90    | 96.00     | 18.00      | 280.00     |
| Tinnitus frequency (Hz)                    | 6251.09 ± 2811.38 | 5887.00   | 1020.00    | 15524.00   |
| Tinnitus loudness (dB SPL)                 | 51.38 ± 16.05     | 50.00     | 27.00      | 85.00      |
| Hearing loss left (dB)                     | 17.26 ± 13.61     | 14.69     | -5.72      | 55.00      |
| Hearing loss right (dB)                    | 17.48 ± 11.52     | 17.43     | -8.71      | 45.87      |
| LDL left (dB) (25 missing values)          | 86.25 ± 3.21      | 85.50     | 81.00      | 90.00      |
| LDL right (dB) (28 missing values)         | 85.06 ± 3.96      | 87.00     | 78.00      | 90.00      |
| Minimum masking level (dB)                 | 63.82 ± 14.60     | 60.00     | 37.00      | 90.00      |
| Sensation Level (dB)                       | 47.58 ± 17.49     | 45.00     | 21.00      | 86.00      |
| TQ total score (0-84)                      | 40.73 ± 15.70     | 40.00     | 17.00      | 71.00      |
| THI total score (0-100)                    | 35.91 ± 21.38     | 34.00     | 4.00       | 80.00      |
| VAS awareness (%)                          | 64.62 ± 29.62     | 70.00     | 8.00       | 100.00     |
| VAS loudness (%)                           | 61.11 ± 24.19     | 65.00     | 15.00      | 100.00     |
| VAS bothersome (%)                         | 38.20 ± 29.29     | 30.00     | 0          | 100.00     |
| GUF total score (0-45)                     | 10.73 ± 6.45      | 10.00     | 0          | 23.00      |

Table 1: **Sample characteristics.** M = mean; SD = standard deviation; Md = median; Min = minimum; Max = maximum; LDL = Loudness Discomfort Level (missings in LDL are due to values over 90 dB); TQ = Tinnitus Questionnaire; THI = Tinnitus Handicap Inventory; VAS = Visual Analog Scale; GUF = Questionnaire on Hypersensitivity to Sound.

|                                                     | Responders        |         |         |         | Non-responders    |         |         |          |                      | p               |
|-----------------------------------------------------|-------------------|---------|---------|---------|-------------------|---------|---------|----------|----------------------|-----------------|
| N (female)                                          | 11 (1)            |         |         |         | 11 (1)            |         |         |          |                      |                 |
| Tinnitus side (left/ right/ bilateral)              | (0/ 5/ 7)         |         |         |         | (3/ 2/ 7)         |         |         |          |                      | .189            |
| Tinnitus loudness fluctuation (yes/ no)             | (7/ 5)            |         |         |         | (6/ 6)            |         |         |          |                      | .682            |
| Tinnitus maskability (yes/ no/ don't know)          | (7/ 0/ 5)         |         |         |         | (7/ 2/ 3)         |         |         |          |                      | .063            |
| Musician (yes/ no)                                  | (3/ 9)            |         |         |         | (1/ 11)           |         |         |          |                      | .590            |
|                                                     | M ± SD            | Md      | Min     | Max     | M ± SD            | Md      | Min     | Max      | t (df)/ U            | p               |
| Age (years)                                         | 54.17 ± 12.14     | 48.00   | 31.00   | 66.00   | 54.38 ± 6.98      | 52.00   | 49.00   | 69.00    | 83.00                | .540            |
| Tinnitus duration (months)                          | 77.00 ± 69.48     | 66.00   | 24.00   | 280.00  | 159.58 ± 75.91    | 165.00  | 51.00   | 252.00   | <b>26.00</b>         | <b>.008</b>     |
| Tinnitus frequency (Hz)                             | 5271.58 ± 1985.77 | 5878.00 | 2250.00 | 9488.00 | 6661.75 ± 2451.11 | 6842.00 | 3226.00 | 10136.00 | -1.53 (21.30)        | .142            |
| Tinnitus loudness (dBSPL)                           | 53.25 ± 14.78     | 54.00   | 32.00   | 72.00   | 53.92 ± 12.30     | 54.00   | 35.00   | 74.00    | -1.12 (21.30)        | .905            |
| Hearing loss left (dB)                              | 19.75 ± 14.70     | 17.00   | 6.47    | 46.64   | 20.61 ± 11.17     | 18.20   | 6.62    | 38.78    | 65.50                | .729            |
| Hearing loss right (dB)                             | 19.89 ± 7.89      | 21.43   | 7.37    | 30.52   | 19.95 ± 11.25     | 21.20   | 5.88    | 38.31    | -0.01 (19.83)        | .988            |
| LDL left (dB) (5 missing values/ 11 missing values) | 85.71 ± 2.93      | 84.00   | 84.00   | 90.00   | 90.00             | -       | -       | -        | 1.00                 | .302            |
| LDL right (dB) (7 missing values/ 8 missing values) | 83.04 ± 6.15      | 81.00   | 78.00   | 90.00   | 86.25 ± 3.77      | 87.00   | 81.00   | 90.00    | -0.85 (6.68)         | .422            |
| Minimum masking level (dB)                          | 56.33 ± 13.15     | 53.00   | 44.00   | 79.00   | 72.92 ± 15.19     | 74.50   | 54.00   | 90.00    | <b>28.00</b>         | <b>.012</b>     |
| Sensation level (dB)                                | 46.00 ± 15.85     | 46.50   | 24.00   | 66.00   | 52.58 ± 8.84      | 53.00   | 39.00   | 70.00    | -1.26 (17.24)        | .225            |
| TQ total score (0-84)                               | 28.00 ± 10.87     | 23.50   | 19.00   | 55.00   | 49.00 ± 15.20     | 43.50   | 30.00   | 71.00    | <b>14.50</b>         | <b>&lt;.001</b> |
| THI total score (0-100)                             | 22.83 ± 16.37     | 14.00   | 4.00    | 52.00   | 48.00 ± 23.34     | 40.00   | 14.00   | 76.00    | <b>-3.30 (19.71)</b> | <b>.004</b>     |
| VAS awareness (%)                                   | 50.00 ± 28.92     | 30.00   | 20.00   | 90.00   | 80.83 ± 25.75     | 100.00  | 30.00   | 100.00   | <b>26.50</b>         | <b>.008</b>     |
| VAS loudness (%)                                    | 48.75 ± 16.25     | 52.50   | 30.00   | 75.00   | 73.33 ± 16.65     | 80.00   | 50.00   | 100.00   | <b>22.50</b>         | <b>.004</b>     |
| VAS bothersome (%)                                  | 21.33 ± 21.98     | 20.00   | 0       | 75.00   | 45.83 ± 29.99     | 45.00   | 10.00   | 100.00   | <b>34.00</b>         | <b>.029</b>     |
| GUF total score (0-45)                              | 6.00 ± 5.48       | 5.00    | 0       | 20.00   | 12.17 ± 5.37      | 11.50   | 1.00    | 20.00    | <b>28.50</b>         | <b>.012</b>     |

Table 2: **Sample characteristics - responders vs. non-responders.** M = mean; SD = standard deviation; Md = median; Min = minimum; Max = maximum; df = degrees of freedom; LDL = Loudness Discomfort Level (missings in LDL are due to values over 90 dB); TQ = Tinnitus Questionnaire; THI = Tinnitus Handicap Inventory; VAS = Visual Analog Scale; GUF = Questionnaire on Hypersensitivity to Sound.

| Contrast            | Estimate     | t            | p               | d           |
|---------------------|--------------|--------------|-----------------|-------------|
| <b>Total sample</b> |              |              |                 |             |
| WN - IBP            | 1.05         | 1.20         | .451            | .057        |
| <b>WN - IBS</b>     | <b>-4.32</b> | <b>-4.96</b> | <b>&lt;.001</b> | <b>.251</b> |
| <b>IBP - IBS</b>    | <b>5.37</b>  | <b>-6.17</b> | <b>&lt;.001</b> | <b>.328</b> |

Table 3: **Post-hoc tukey contrasts for condition.** WN = white noise; IBP = individualized bandpass filtered white noise; IBS = individualized bandstop filtered white noise; degrees of freedom = 902.00; standard error = .87.



|                                                         | Frequency (Hz) | Cluster statistic (df) | p     | Peak frequency (Hz) | Peak electrode | Max. statistic |
|---------------------------------------------------------|----------------|------------------------|-------|---------------------|----------------|----------------|
| <b>Time</b>                                             |                |                        |       |                     |                |                |
| Positive cluster                                        | 1-7            | t(134) = 1047.88       | <.001 | 4                   | PO8            | 7.68           |
| Positive cluster                                        | 26-45          | t(134) = 893.13        | <.001 | 41                  | POz            | 4.89           |
| Negative cluster                                        | 7-28           | t(134) = -1150.64      | <.001 | 12                  | T8             | -5.33          |
| <b>Condition x Time</b>                                 |                |                        |       |                     |                |                |
| Positive cluster                                        | 1-7            | F(5,40) = 3437.77      | .002  | 4                   | PO8            | 51.28          |
| Positive cluster                                        | 36-45          | F(5,40) = 2783.52      | .002  | 42                  | F6             | 34.09          |
| <b>Post-hoc - pre vs. post stimulation per stimulus</b> |                |                        |       |                     |                |                |
| <b>Positive cluster</b>                                 |                |                        |       |                     |                |                |
| WN                                                      | 1-7            | t(44) = 482.28         | .006  | 5                   | O1             | 4.81           |
| IBP                                                     | 1-6            | t(44) = 696.17         | .002  | 3                   | O1             | 5.90           |
| IBP                                                     | 32-45          | t(44) = 460.98         | .007  | 41                  | F3             | 4.44           |
| IBS                                                     | 1-6            | t(44) = 398.13         | .006  | 3                   | O2             | 4.20           |
| IBS                                                     | 37-45          | t(44) = 199.09         | .026  | 45                  | P2             | 3.54           |
| <b>Negative cluster</b>                                 |                |                        |       |                     |                |                |
| WN                                                      | 10-12          | t(44) = -132.92        | .058  | 11                  | T8             | -4.24          |
| WN                                                      | 14-19          | t(44) = -123.90        | .064  | 19                  | C3             | -3.95          |
| IBS                                                     | 11-19          | t(44) = -242.31        | .016  | 13                  | T8             | -4.20          |

**Table 4: Electrophysiology - results of cluster-based permutation test for the total sample analysis.** WN = white noise; IBP = individualized bandpass filtered white noise; IBS = individualized bandstop filtered white noise; df = degrees of freedom; Max = maximum. Positive clusters indicate increased power spectra whereas negative clusters indicate decreased power spectra from pre to post stimulation, in the respective frequency ranges. Peak frequency (Hz) and peak electrode represent the particular frequency and electrode featuring the maximum value obtained from cluster statistics.

|                                                                                       | Frequency (Hz) | Cluster statistic (df) | p     | Peak frequency (Hz) | Peak electrode | Max. statistic |
|---------------------------------------------------------------------------------------|----------------|------------------------|-------|---------------------|----------------|----------------|
| <b>Time</b>                                                                           |                |                        |       |                     |                |                |
| Negative cluster                                                                      | 6-32           | t(11) = -1539.00       | <.001 | 18                  | TP7            | -6.77          |
| <b>Group</b>                                                                          |                |                        |       |                     |                |                |
| Positive cluster                                                                      | 7-12           | t(22) = 246.27         | .082  | 9                   | F4             | 4.35           |
| Negative cluster                                                                      | 22-45          | t(22) = -573.34        | .024  | 31                  | P5             | -4.06          |
| <b>Exploratory post-hoc contrast - responders vs. non-responders post stimulation</b> |                |                        |       |                     |                |                |
| Positive cluster                                                                      | 5-17           | t(22) = 549.39         | .035  | 9                   | F4             | 4.94           |

**Table 5: Electrophysiology - results of cluster-based permutation test for the responder analysis.** df = degrees of freedom; Max = maximum. Positive clusters indicate increased power spectra, whereas negative clusters indicate decreased power spectra for responders compared to non-responders respectively from pre to post stimulation (effect of time) in the respective frequency ranges. Peak frequency (Hz) and peak electrode represent the particular frequency and electrode featuring the maximum value obtained from cluster statistics.

## 914 7 Figures

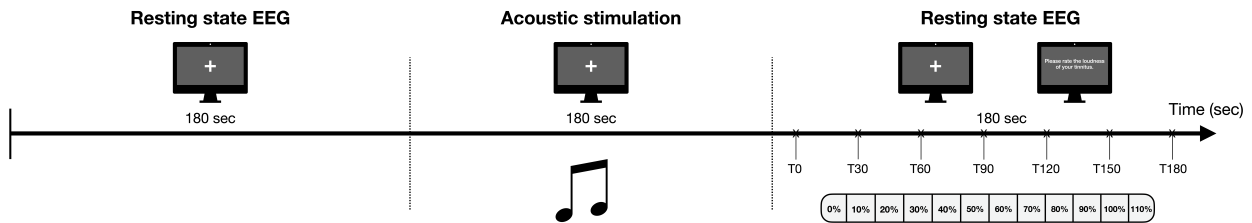

Figure 1: **Acoustic stimulation procedure.** Prior and post of acoustic stimulation (3 minutes), participants resting state brain activity was recorded via EEG (3 minutes). Participants were instructed accordingly and requested to focus on a white fixation cross on a black screen during the whole experiment. Following acoustic stimulation, participants were requested to rate the current loudness of their tinnitus ("Please rate the loudness of your tinnitus.") at seven points in time (0, 30, 60, 90, 120, 150 and 180 seconds towards stimulation offset) on a numeric rating scale from 0% to 110% (0% - total absence of tinnitus; 100% - no tinnitus loudness changes; 110% - 10% tinnitus loudness increase). This acoustic stimulation procedure was repeated for each of the three used types of noise stimuli (white noise, individualized bandpass filtered white noise, individualized bandstop filtered white noise).

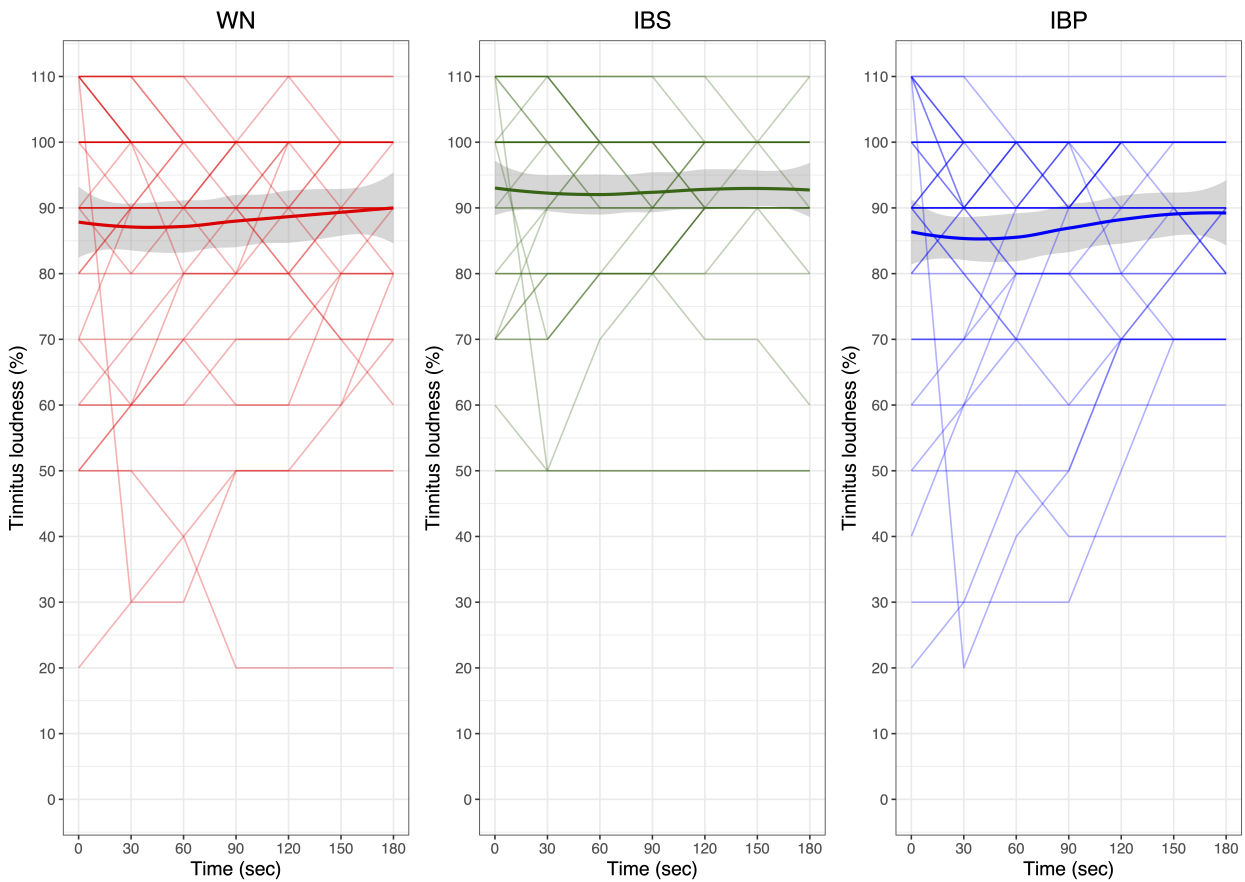

**Figure 2: Tinnitus loudness time curve per condition.** WN = white noise; IBP = individualized bandpass filtered white noise; IBS = individualized bandstop filtered white noise. Tinnitus loudness ratings are illustrated on a single participant level for all rating timepoints separated for each stimuli. Thick lines show the mean tinnitus loudness (%) per stimulus, standard deviations are illustrated as grey ribbons.

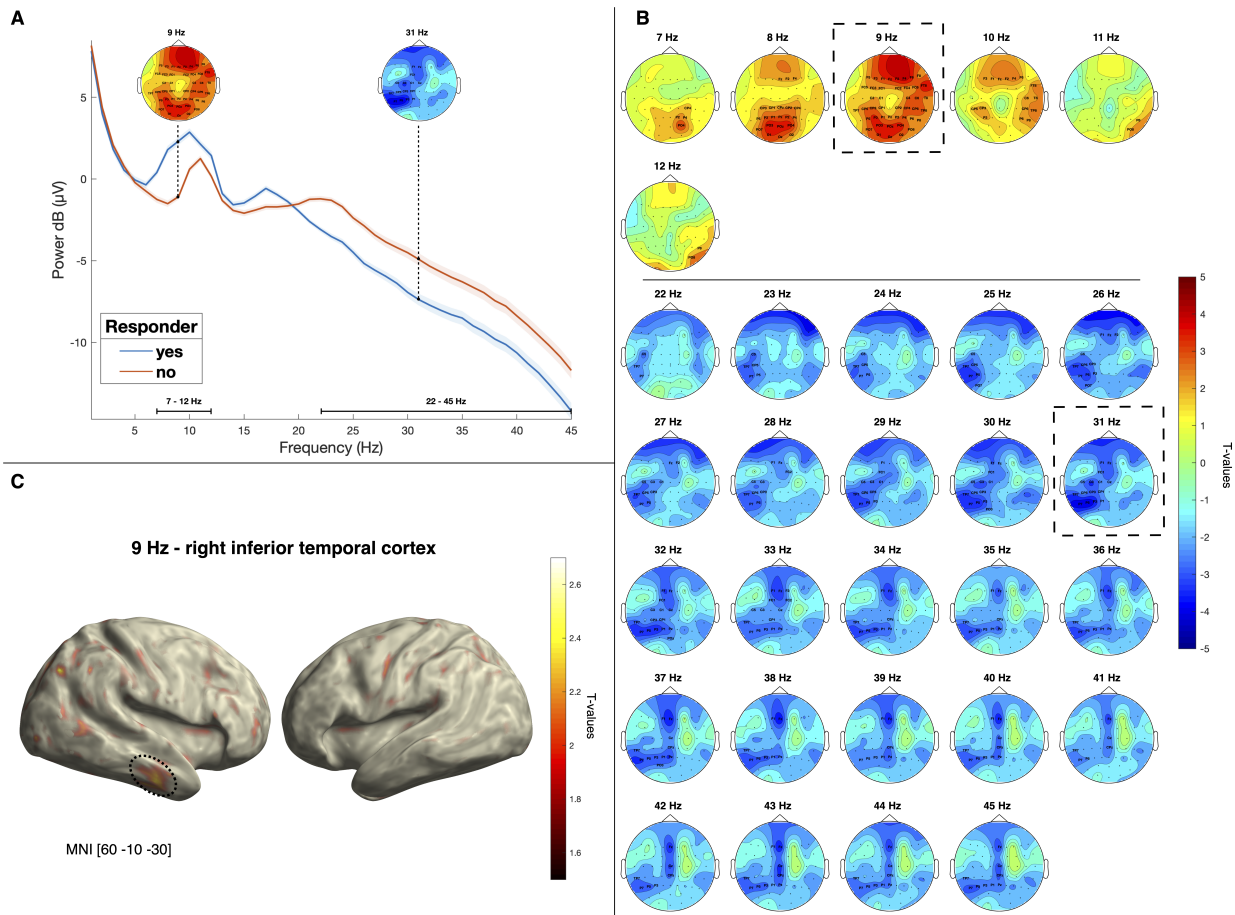

**Figure 3: Responders vs. non-responders - contrast of power spectra at the sensor and source level. A:** Power spectra differences for responders and non-responders for the frequencies 1-45 Hz. Significant positive cluster 5-17 Hz and negative cluster 22-45 Hz as well as the respective peak frequencies (9 Hz and 31 Hz) are highlighted. Grey ribbons represent the standard deviation for each subgroup. **B:** Cluster statistic results (t-values) of power spectra contrasts between responders and non-responders are presented as topographic plots per frequency for a positive cluster of 5-17 Hz and a negative cluster of 22-45 Hz. Significant cluster electrodes are accentuated in bold and labeled per frequency. Peak frequencies of 9 Hz and 31 Hz, representing the maximum values obtained from the cluster statistics, are highlighted with dashed line rectangles. **C:** Source localization of 9 Hz EEG power peaking in the right inferior temporal gyrus (BA 20).

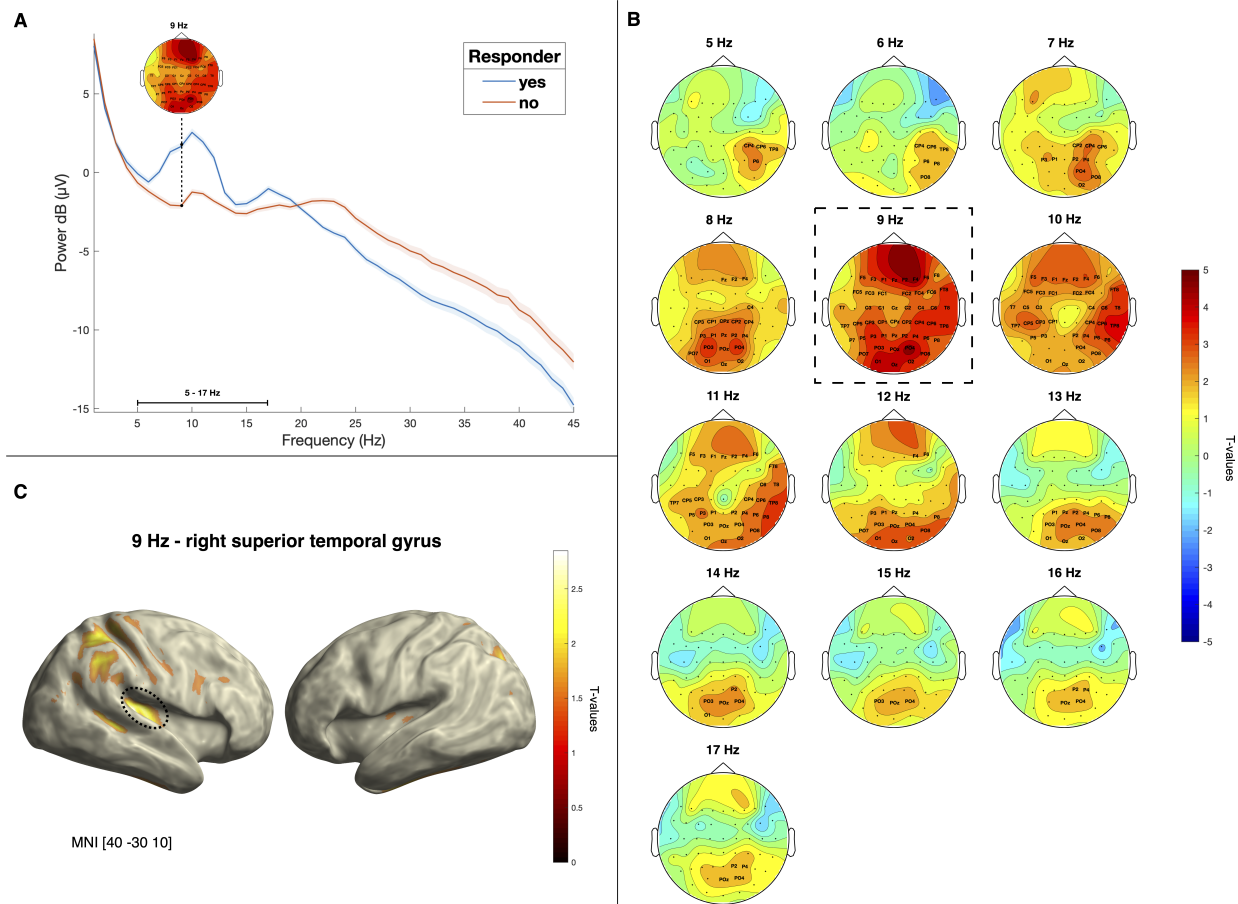

**Figure 4: Responders vs. non-responders - post stimulation power spectra contrasts at the sensor and source level.** **A:** Power spectra differences for responders and non-responders for the frequencies 1-45 Hz. Significant positive cluster 5-17 Hz with the respective peak frequency of 9 Hz is highlighted. Grey ribbons represent the standard deviation for each subgroup. **B:** Results of cluster statistics (t-values) of power spectra contrasts between responders and non-responders following acoustic stimulation are presented as topographic plots per frequency for a positive cluster comprised of 5-17 Hz. Significant cluster electrodes are accentuated in bold and labeled per frequency. Peak frequency of 9 Hz is highlighted with a dashed line rectangle. **C:** Source localization of 9 Hz EEG power peaking in the right superior temporal gyrus (BA 41).

## 915 8 Appendices

|                     | Total         |        |       |        | T0            |        |       |        |
|---------------------|---------------|--------|-------|--------|---------------|--------|-------|--------|
|                     | M ± SD        | Md     | Min   | Max    | M ± SD        | Md     | Min   | Max    |
| <b>Total sample</b> |               |        |       |        |               |        |       |        |
| WN                  | 88.29 ± 19.26 | 100.00 | 20.00 | 110.00 | 88.00 ± 21.60 | 90.00  | 20.00 | 110.00 |
| IBP                 | 87.24 ± 17.73 | 90.00  | 20.00 | 110.00 | 86.67 ± 21.95 | 90.00  | 20.00 | 110.00 |
| IBS                 | 92.60 ± 14.77 | 100.00 | 50.00 | 110.00 | 93.11 ± 16.35 | 100.00 | 50.00 | 110.00 |

Table S1: **Tinnitus loudness per condition.** WN = white noise; IBP = individualized bandpass filtered white noise; IBS = individualized bandstop filtered white noise; M = mean; SD = standard deviation; Md = median; Min = minimum; Max = maximum; T0 = immediately after stimulation offset

|                                              | R <sup>2</sup> (marginal) | R <sup>2</sup> (conditional) | df | AIC     | BIC     | logLik   | LRT   | p     |
|----------------------------------------------|---------------------------|------------------------------|----|---------|---------|----------|-------|-------|
| <b>Total sample</b>                          |                           |                              |    |         |         |          |       |       |
| Intercept only: response ~ 1 + (1 id)        | 0                         | .59                          | 3  | 7402.10 | 7416.70 | -3698.10 |       |       |
| Fitted model : response ~ condition + (1 id) | .02                       | .61                          | 5  | 7364.20 | 7388.50 | -3677.10 | 41.88 | <.001 |

Table S2: **Model fitting - tinnitus loudness ratings.** df = degrees of freedom; AIC = Akaike Information Criterion; BIC = Bayesian Information Criterion; logLik = log-likelihood; LRT = Likelihood Ratio Test

|           | numDF | denDF  | F     | p     |
|-----------|-------|--------|-------|-------|
| Condition | 2.00  | 900.00 | 21.43 | <.001 |

Table S3: **Fixed effect testing - tinnitus loudness ratings.** numDF = degrees of freedom numerator; denDF = degrees of freedom denominator

|               | Valence     |      |       |      | Arousal      |       |       |      |
|---------------|-------------|------|-------|------|--------------|-------|-------|------|
|               | M ± SD      | Md   | Min   | Max  | M ± SD       | Md    | Min   | Max  |
| WN            | .18 ± 1.83  | 0    | -4.00 | 4.00 | -.16 ± 1.68  | 0     | -4.00 | 3.00 |
| IBP           | -.40 ± 2.18 | 0    | -4.00 | 4.00 | .51 ± 1.73   | 0     | -3.00 | 3.00 |
| IBS           | 1.02 ± 2.09 | 2.00 | -4.00 | 4.00 | -.84 ± 1.82  | 0     | -4.00 | 3.00 |
| <b>Male</b>   |             |      |       |      |              |       |       |      |
| WN            | .03 ± 1.47  | 0    | -4.00 | 3.00 | .19 ± 1.25   | 0     | -3.00 | 3.00 |
| IBP           | -.39 ± 2.26 | 0    | -4.00 | 4.00 | .68 ± 1.58   | 0     | -2.00 | 3.00 |
| IBS           | .87 ± 1.98  | 1.00 | -4.00 | 4.00 | -.52 ± 1.69  | 0     | -4.00 | 3.00 |
| <b>Female</b> |             |      |       |      |              |       |       |      |
| WN            | .50 ± 2.47  | 0    | -4.00 | 4.00 | .50 ± 2.47   | 0     | -4.00 | 4.00 |
| IBP           | -.43 ± 2.06 | 0    | -4.00 | 3.00 | -.43 ± 2.06  | 0     | -4.00 | 3.00 |
| IBS           | 1.36 ± 2.37 | 2.00 | -4.00 | 4.00 | -1.57 ± 1.95 | -2.00 | -4.00 | 2.00 |

Table S4: **Stimulus evaluation.** WN = white noise; IBP = individualized bandpass filtered white noise; IBS = individualized bandstop filtered white noise; M = mean; SD = standard deviation; Md = median; Min = minimum; Max = maximum

| Model                                                | R <sup>2</sup> (marginal) | R <sup>2</sup> (conditional) | df | AIC    | BIC    | logLIK  | LRT   | p     |
|------------------------------------------------------|---------------------------|------------------------------|----|--------|--------|---------|-------|-------|
| <b>Valence</b>                                       |                           |                              |    |        |        |         |       |       |
| Intercept only: response ~ 1 + (1 id)                | 0                         | .32                          | 3  | 577.52 | 586.23 | -285.76 |       |       |
| Fitted model: response ~ condition + (1 id)          | .01                       | .43                          | 5  | 564.91 | 579.44 | -277.46 | 16.60 | <.001 |
| <b>Arousal</b>                                       |                           |                              |    |        |        |         |       |       |
| Intercept only: response ~ 1 + (1 id)                | 0                         | .22                          | 3  | 543.75 | 552.46 | -268.87 |       |       |
| Fitted model: response ~ condition + gender + (1 id) | .15                       | .35                          | 6  | 526.72 | 544.15 | -257.36 | 20.03 | <.001 |

Table S5: **Model fitting - valence & arousal ratings.** df = degrees of freedom; AIC = Akaike Information Criterion; BIC = Bayesian Information Criterion; logLik = log-likelihood; LRT = Likelihood Ratio Test

|                | numDF | denDF | F    | p     |
|----------------|-------|-------|------|-------|
| <b>Valence</b> |       |       |      |       |
| Condition      | 2.00  | 90.00 | 9.12 | <.001 |
| <b>Arousal</b> |       |       |      |       |
| Condition      | 2.00  | 90.00 | 9.76 | <.001 |
| Gender         | 1.00  | 45.00 | 5.70 | .021  |

Table S6: **Fixed effect testing - valence & arousal ratings.** numDF = degrees of freedom numerator; denDF = degrees of freedom denominator



| <b>Contrast</b>      | <b>Valence</b>  |              |                 |             | <b>Arousal</b>  |             |                 |             |
|----------------------|-----------------|--------------|-----------------|-------------|-----------------|-------------|-----------------|-------------|
|                      | <b>Estimate</b> | <b>t</b>     | <b>p</b>        | <b>d</b>    | <b>Estimate</b> | <b>t</b>    | <b>p</b>        | <b>d</b>    |
| WN - IBP             | 0.58            | 1.71         | .209            | .288        | -.76            | -2.15       | .086            | .392        |
| <b>WN - IBS</b>      | <b>-.84</b>     | <b>-2.49</b> | <b>.038</b>     | <b>.428</b> | 0.69            | 2.22        | .073            | .388        |
| <b>IBP - IBS</b>     | <b>-1.42</b>    | <b>-4.20</b> | <b>&lt;.001</b> | <b>.665</b> | <b>1.36</b>     | <b>4.37</b> | <b>&lt;.001</b> | <b>.760</b> |
| <b>Male - Female</b> |                 |              |                 |             | <b>.90</b>      | <b>2.33</b> | <b>.024</b>     | <b>.728</b> |

Table S7: **Post-hoc tukey contrasts for condition - stimulus evaluation.** WN = white noise; IBP = individualized bandpass filtered white noise; IBS = individualized bandstop filtered white noise. Valence: Degrees of freedom = 92.00; standard error = .34; Arousal: Degrees of freedom = 92.00; standard error = .31; Gender: Degrees of freedom = 47.10; standard error = .39

|                                                         | Frequency (Hz) | Cluster electrodes                                                                                                                                                                                                                                                                |
|---------------------------------------------------------|----------------|-----------------------------------------------------------------------------------------------------------------------------------------------------------------------------------------------------------------------------------------------------------------------------------|
| <b>Time</b>                                             |                |                                                                                                                                                                                                                                                                                   |
| Positive cluster                                        | 1-7            | frontal: F3, F4, F7, F8, Fz, F1, F2, F5, F6 central: Cz, Pz, FC1, FC2, CP1, CP2, C1, C2, P1, P2, CPz temporal: C3, C4, T7, T8, F05, F06, F03, F04, C5, C6, FT7, FT8 parietal: P3, P4, P7, P8, CP5, CP6, CP3, CP4, P5, P6, TP7, TP8 occipital: O1, O2, PO3, PO4, PO7, PO8, POz, Oz |
| Positive cluster                                        | 26-45          | frontal: F3, F4, F7, F8, Fz, F1, F2, F5, F6 central: Cz, Pz, FC1, FC2, CP1, CP2, C1, C2, P1, P2, CPz temporal: C3, C4, T7, T8, F05, F06, F03, F04, C5, C6, FT7, FT8 parietal: P3, P4, P7, P8, CP5, CP6, CP3, CP4, P5, P6, TP7, TP8 occipital: O1, O2, PO3, PO4, PO7, PO8, POz, Oz |
| Negative cluster                                        | 7-28           | frontal: F3, F4, F7, F8, Fz, F1, F2, F5, F6 central: Cz, Pz, FC1, FC2, CP1, CP2, C1, C2, P1, P2, CPz temporal: C3, C4, T7, T8, F05, F06, F03, F04, C5, C6, FT7, FT8 parietal: P3, P4, P7, P8, CP5, CP6, CP3, CP4, P5, P6, TP7, TP8 occipital: O1, O2, PO3, PO4, PO7, PO8, POz, Oz |
| <b>Condition x Time</b>                                 |                |                                                                                                                                                                                                                                                                                   |
| Positive cluster                                        | 1-7            | frontal: F3, F4, F7, F8, Fz, F1, F2, F5, F6 central: Cz, Pz, FC1, FC2, CP1, CP2, C1, C2, P1, P2, CPz temporal: C3, C4, T7, T8, F05, F06, F03, F04, C5, C6, FT7, FT8 parietal: P3, P4, P7, P8, CP5, CP6, CP3, CP4, P5, P6, TP7, TP8 occipital: O1, O2, PO3, PO4, PO7, PO8, POz, Oz |
| Positive cluster                                        | 36-45          | frontal: F3, F4, F7, F8, Fz, F1, F2, F5, F6 central: Cz, Pz, FC1, FC2, CP1, CP2, C1, C2, P1, P2, CPz temporal: C3, C4, T7, T8, F05, F06, F03, F04, C5, C6, FT7, FT8 parietal: P3, P4, P7, P8, CP5, CP6, CP3, CP4, P5, P6, TP7, TP8 occipital: O1, O2, PO3, PO4, PO7, PO8, POz, Oz |
| <b>Post-hoc - pre vs. post stimulation per stimulus</b> |                |                                                                                                                                                                                                                                                                                   |
| Positive cluster                                        | 1-7            | frontal: F3, F4, F7, F8, Fz, F1, F2, F5, F6 central: Cz, Pz, FC1, FC2, CP1, CP2, C1, C2, P1, P2, CPz temporal: C3, C4, T7, T8, F05, F06, F03, F04, C5, C6, FT7, FT8 parietal: P3, P4, P7, P8, CP5, CP6, CP3, CP4, P5, P6, TP7, TP8 occipital: O1, O2, PO3, PO4, PO7, PO8, POz, Oz |
| IBP                                                     | 1-6            | frontal: F3, F4, F7, F8, Fz, F1, F2, F5, F6 central: Cz, Pz, FC1, FC2, CP1, CP2, C1, C2, P1, P2, CPz temporal: C3, C4, T7, T8, F05, F06, F03, F04, C5, C6, FT7, FT8 parietal: P3, P4, P7, P8, CP5, CP6, CP3, CP4, P5, P6, TP7, TP8 occipital: O1, O2, PO3, PO4, PO7, PO8, POz, Oz |
| IBP                                                     | 32-45          | frontal: F3, F4, F7, F8, Fz, F1, F2, F5, F6 central: Cz, Pz, FC1, FC2, CP1, CP2, C1, C2, P1, P2, CPz temporal: C3, C4, T7, T8, F05, F06, F03, F04, C5, C6, FT7, FT8 parietal: P3, P4, P7, P8, CP5, CP6, CP3, CP4, P5, P6, TP7, TP8 occipital: O1, O2, PO3, PO4, PO7, PO8, POz, Oz |
| IBS                                                     | 1-6            | frontal: F3, F4, F7, F8, Fz, F1, F2, F5, F6 central: Cz, Pz, FC1, FC2, CP1, CP2, C1, C2, P1, P2, CPz temporal: C3, C4, T7, T8, F05, F06, F03, F04, C5, C6, FT7, FT8 parietal: P3, P4, P7, P8, CP5, CP6, CP3, CP4, P5, P6, TP7, TP8 occipital: O1, O2, PO3, PO4, PO7, PO8, POz, Oz |
| IBS                                                     | 37-45          | frontal: F3, F4, F7, F8, Fz, F1, F2, F5, F6 central: Cz, Pz, FC1, FC2, CP1, CP2, C1, C2, P1, P2, CPz temporal: C3, C4, T7, T8, F05, F06, F03, F04, C5, C6, FT7, FT8 parietal: P3, P4, P7, P8, CP5, CP6, CP3, CP4, P5, P6, TP7, TP8 occipital: O1, O2, PO3, PO4, PO7, PO8, POz, Oz |
| <b>Negative cluster</b>                                 |                |                                                                                                                                                                                                                                                                                   |
| WN                                                      | 10-12          | frontal: F3, F4, F7, F8, Fz, F1, F2, F5, F6 central: Cz, Pz, FC1, FC2, CP1, CP2, C1, C2, P1, P2, CPz temporal: C3, C4, T7, T8, F05, F06, F03, F04, C5, C6, FT7, FT8 parietal: P3, P4, P7, P8, CP5, CP6, CP3, CP4, P5, P6, TP7, TP8 occipital: O1, O2, PO3, PO4, PO7, PO8, POz, Oz |
| WN                                                      | 14-19          | frontal: F3, F4, F7, F8, Fz, F1, F2, F5, F6 central: Cz, Pz, FC1, FC2, CP1, CP2, C1, C2, P1, P2, CPz temporal: C3, C4, T7, T8, F05, F06, F03, F04, C5, C6, FT7, FT8 parietal: P3, P4, P7, P8, CP5, CP6, CP3, CP4, P5, P6, TP7, TP8 occipital: O1, O2, PO3, PO4, PO7, PO8, POz, Oz |
| IBS                                                     | 11-19          | frontal: F3, F4, F7, F8, Fz, F1, F2, F5, F6 central: Cz, Pz, FC1, FC2, CP1, CP2, C1, C2, P1, P2, CPz temporal: C3, C4, T7, T8, F05, F06, F03, F04, C5, C6, FT7, FT8 parietal: P3, P4, P7, P8, CP5, CP6, CP3, CP4, P5, P6, TP7, TP8 occipital: O1, O2, PO3, PO4, PO7, PO8, POz, Oz |

**Table S8: Cluster electrodes - total sample analysis.** WN = white noise; IBP = individualized bandpass filtered white noise; IBS = individualized bandstop filtered white noise. Electrodes within frequency clusters grouped by brain areas.

|                                                                  | Frequency (Hz) | Cluster electrodes                                                                                                                                                                                                                                                                |
|------------------------------------------------------------------|----------------|-----------------------------------------------------------------------------------------------------------------------------------------------------------------------------------------------------------------------------------------------------------------------------------|
| <b>Group</b>                                                     |                |                                                                                                                                                                                                                                                                                   |
| Positive cluster                                                 | 7-19           | frontal: F3, F4, F8, Fz, F1, F2, F5, F6 central: Cz, Pz, FC1, FC2, CP1, CP2, C1, C2, P1, P2, CPz temporal: C3, C4, T7, T8, F05, F06, F03, F04, C5, C6, FT7, FT8 parietal: P3, P4, P7, P8, CP5, CP6, CP3, CP4, P5, P6, TP7, TP8 occipital: O1, O2, PO3, PO4, PO7, PO8, POz, Oz     |
| Negative cluster                                                 | 22-45          | frontal: Fz, F1, F2 central: Cz, Pz, FC1, FC2, CP1, CP2, C1, C2, P1, P2, CPz temporal: C3, C4, T7, T8, F05, F06, F03, F04, C5, C6, FT7, FT8 parietal: P3, P4, P7, P8, CP5, CP6, CP3, CP4, P5, P6, TP7, TP8 occipital: O1, O2, PO3, PO4, PO7, PO8, POz, Oz                         |
| <b>Time</b>                                                      |                |                                                                                                                                                                                                                                                                                   |
| Negative cluster                                                 | 6-32           | frontal: F3, F4, F7, F8, Fz, F1, F2, F5, F6 central: Cz, Pz, FC1, FC2, CP1, CP2, C1, C2, P1, P2, CPz temporal: C3, C4, T7, T8, F05, F06, F03, F04, C5, C6, FT7, FT8 parietal: P3, P4, P7, P8, CP5, CP6, CP3, CP4, P5, P6, TP7, TP8 occipital: O1, O2, PO3, PO4, PO7, PO8, POz, Oz |
| <b>Post-hoc - responders vs. non-responders post stimulation</b> |                |                                                                                                                                                                                                                                                                                   |
| Positive cluster                                                 | 5-17           | frontal: F3, F4, F8, Fz, F1, F2, F5, F6 central: Cz, Pz, FC1, FC2, CP1, CP2, C1, C2, P1, P2, CPz temporal: C3, C4, T7, T8, F05, F06, F03, F04, C5, C6, FT7, FT8 parietal: P3, P4, P7, P8, CP5, CP6, CP3, CP4, P5, P6, TP7, TP8 occipital: O1, O2, PO3, PO4, PO7, PO8, POz, Oz     |

**Table S9: Cluster electrodes - non-responder vs. responder analysis.** Electrodes within frequency clusters grouped by brain areas.

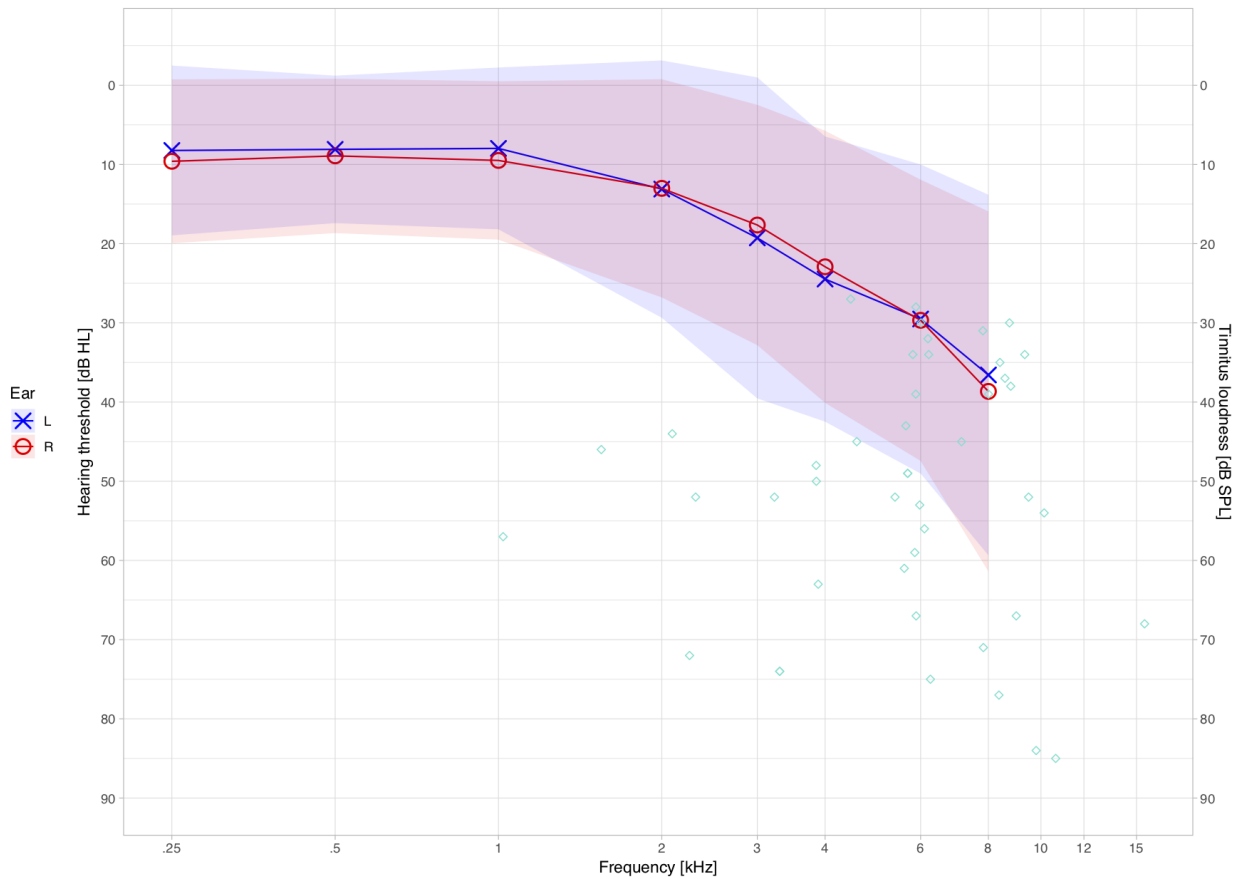

Figure S1: **Audiometry and Tinnitometry.** L = left; R = right; HL = hearing loss; SPL = sound pressure level. Results of audiometric assessment for both ears together with tinnitus frequency and loudness. The frequencies of hearing loss overlap with tinnitus frequencies.

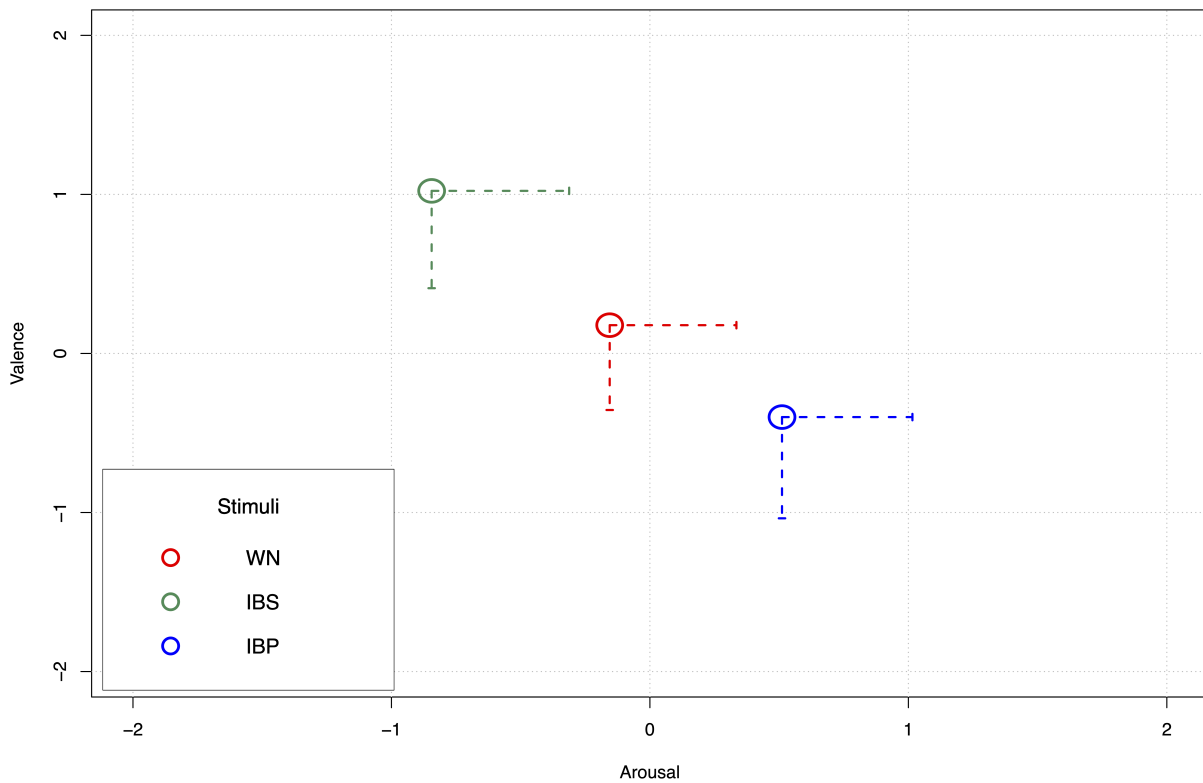

Figure S2: **Valence and arousal evaluation per stimuli.** WN = white noise; IBP = individualized bandpass filtered white noise; IBS = individualized bandstop filtered white noise. The value 0 indicates a neutral stimuli evaluation (cf. section acoustic stimulation). Highest tolerability was found for stimulus IBS as exemplified by high valence and low arousal ratings. While stimulus IBP resulted in the lowest tolerability evaluation. Parentheses display 95% confidence intervals for valence and arousal evaluation of the three stimuli.

WN

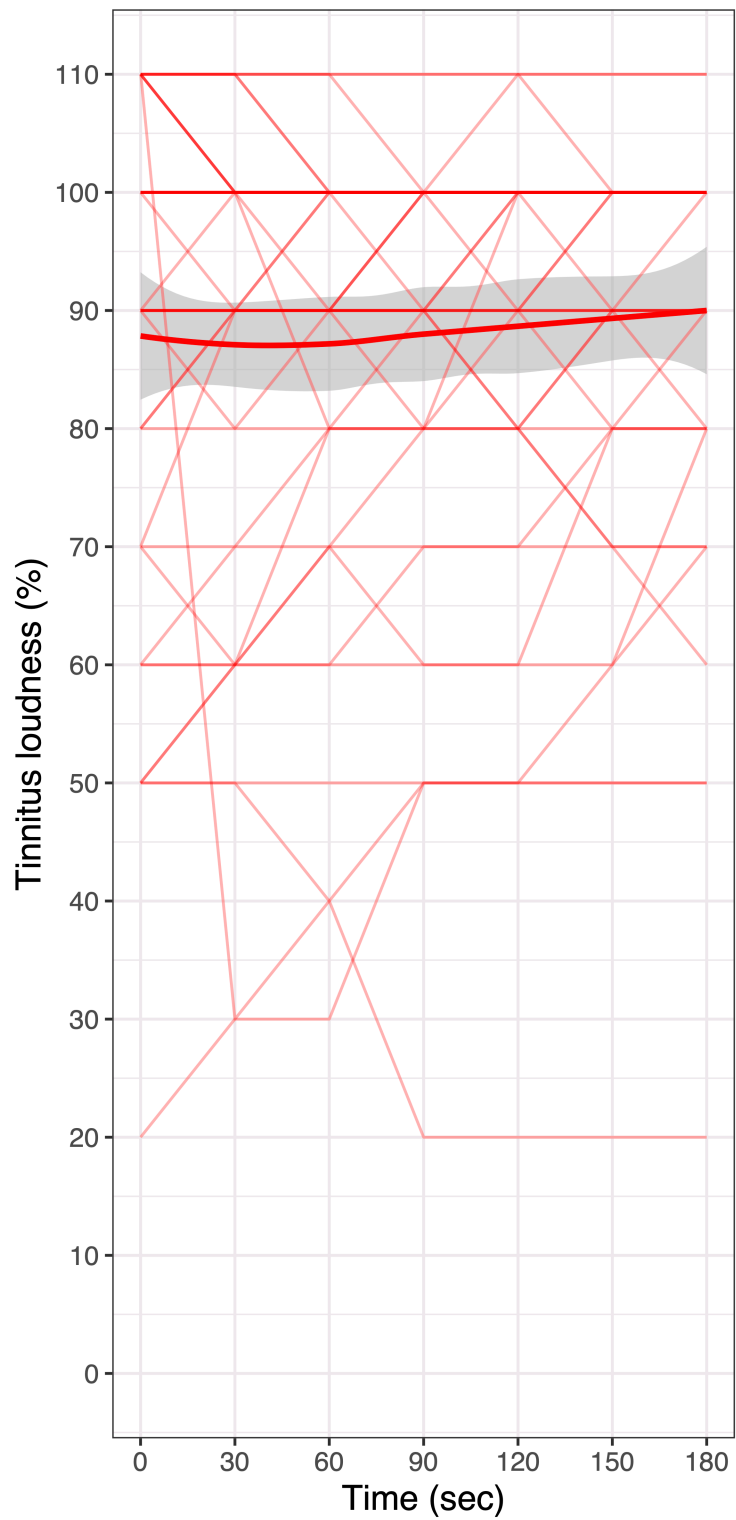

IBS

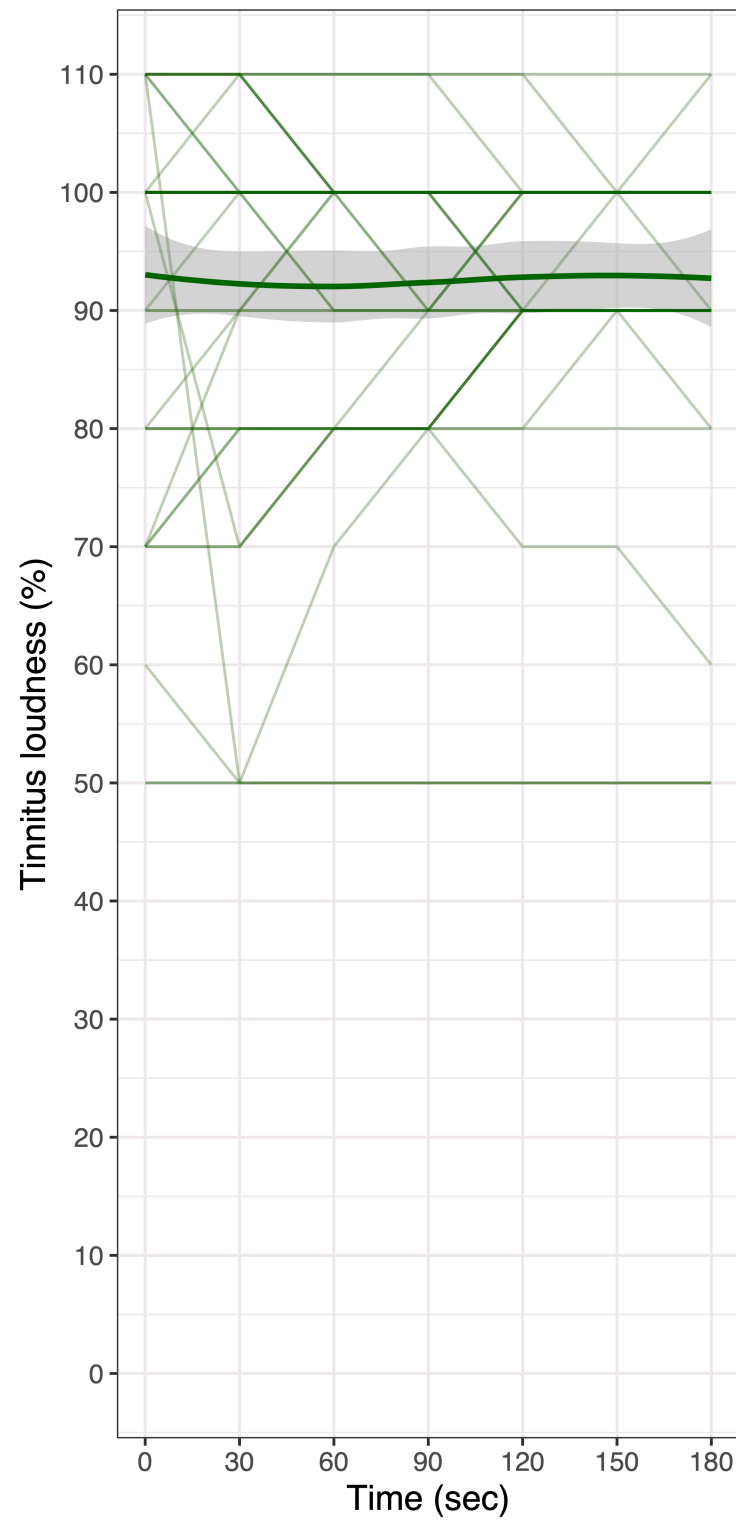

IBP

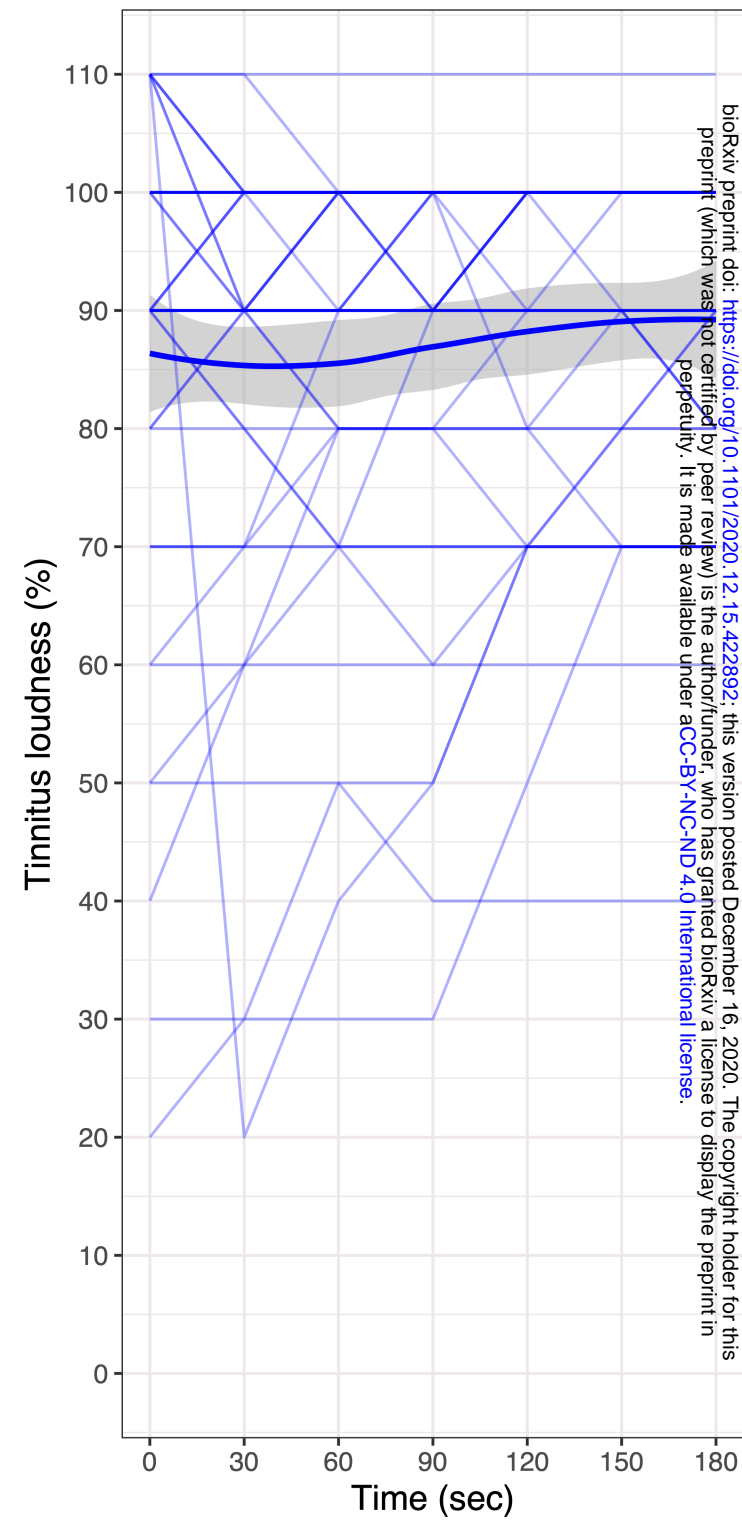

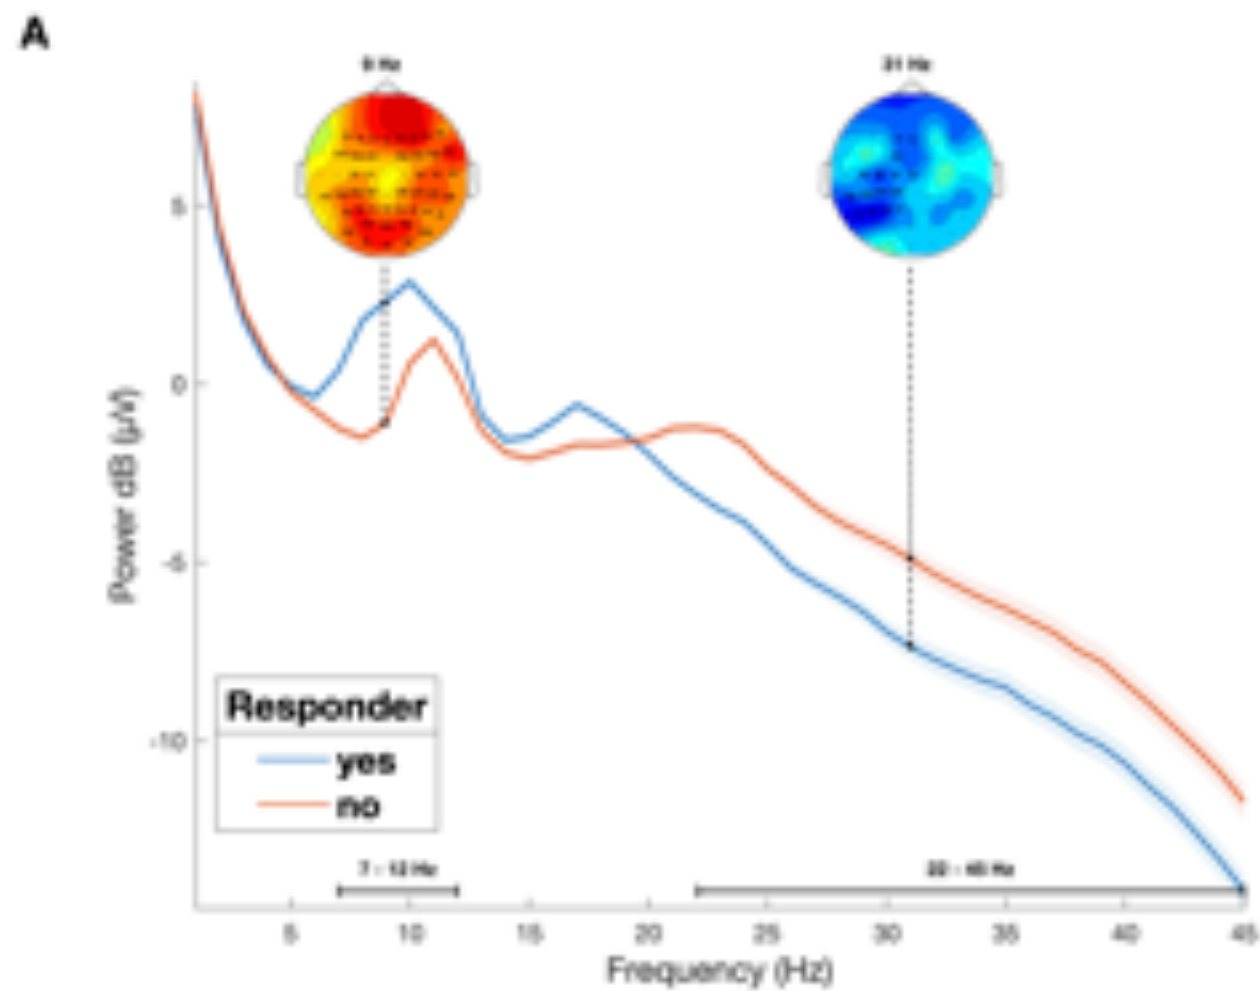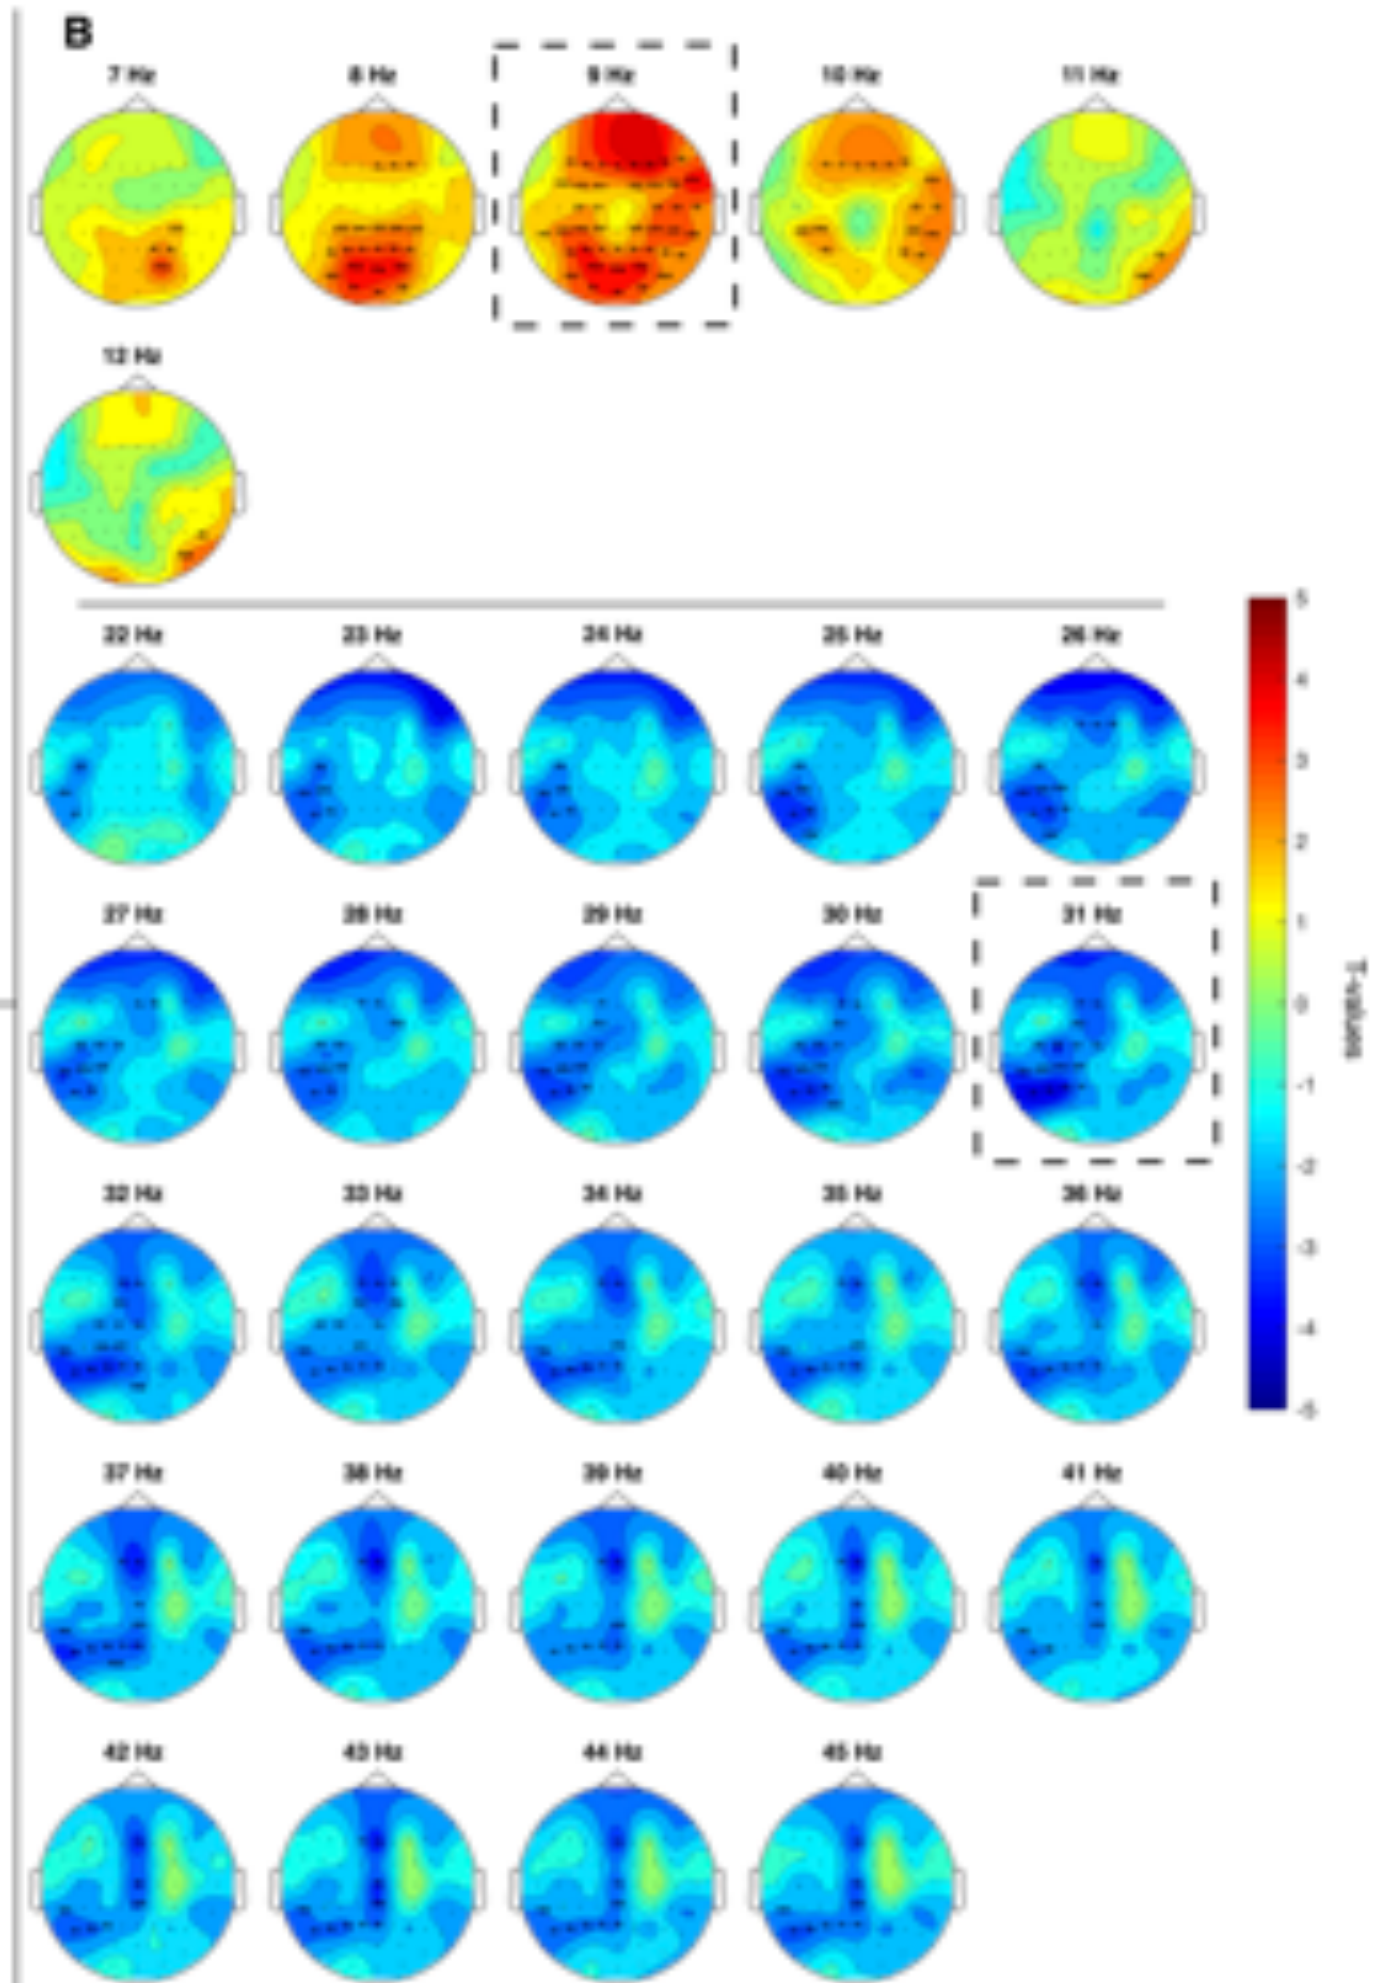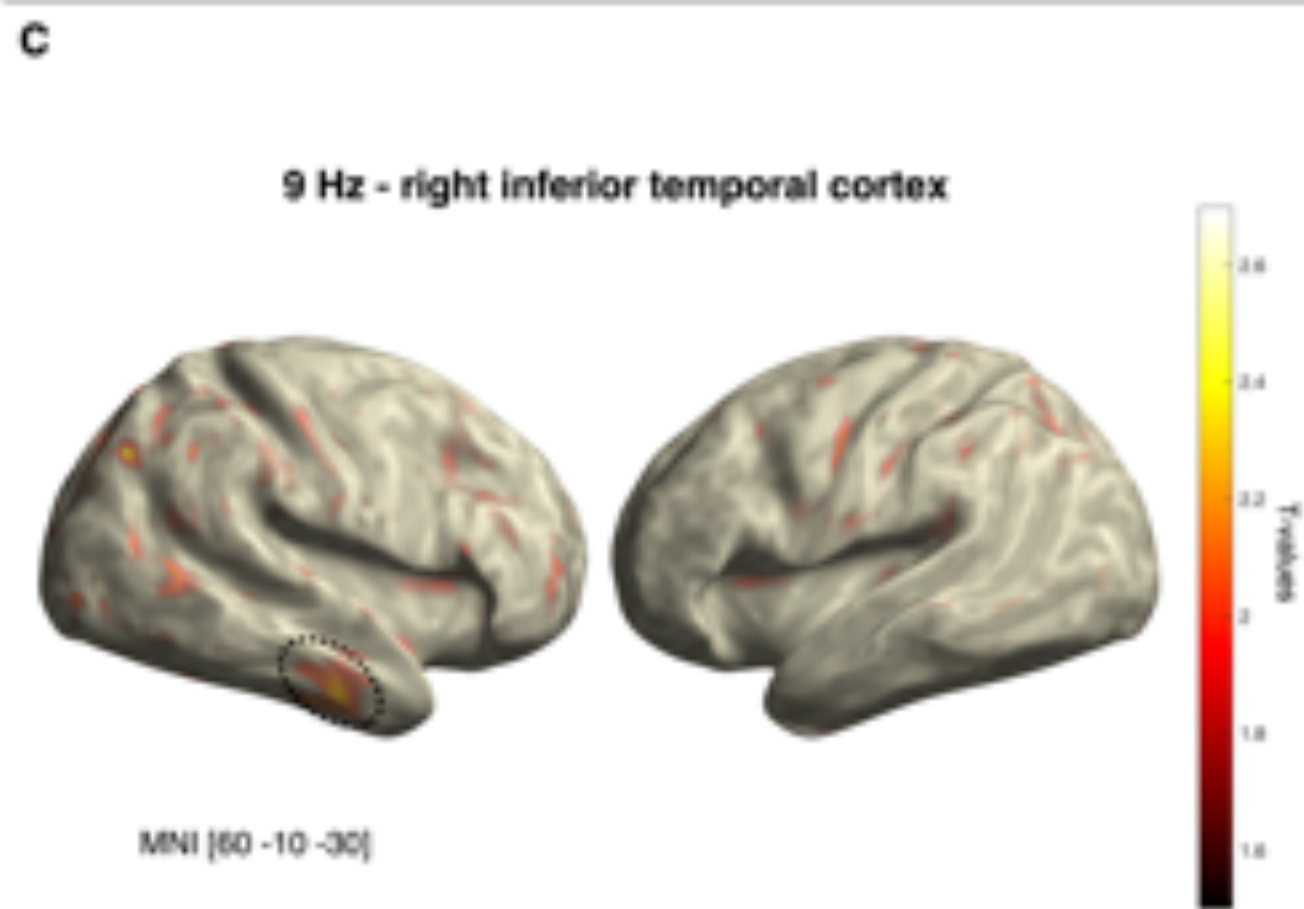



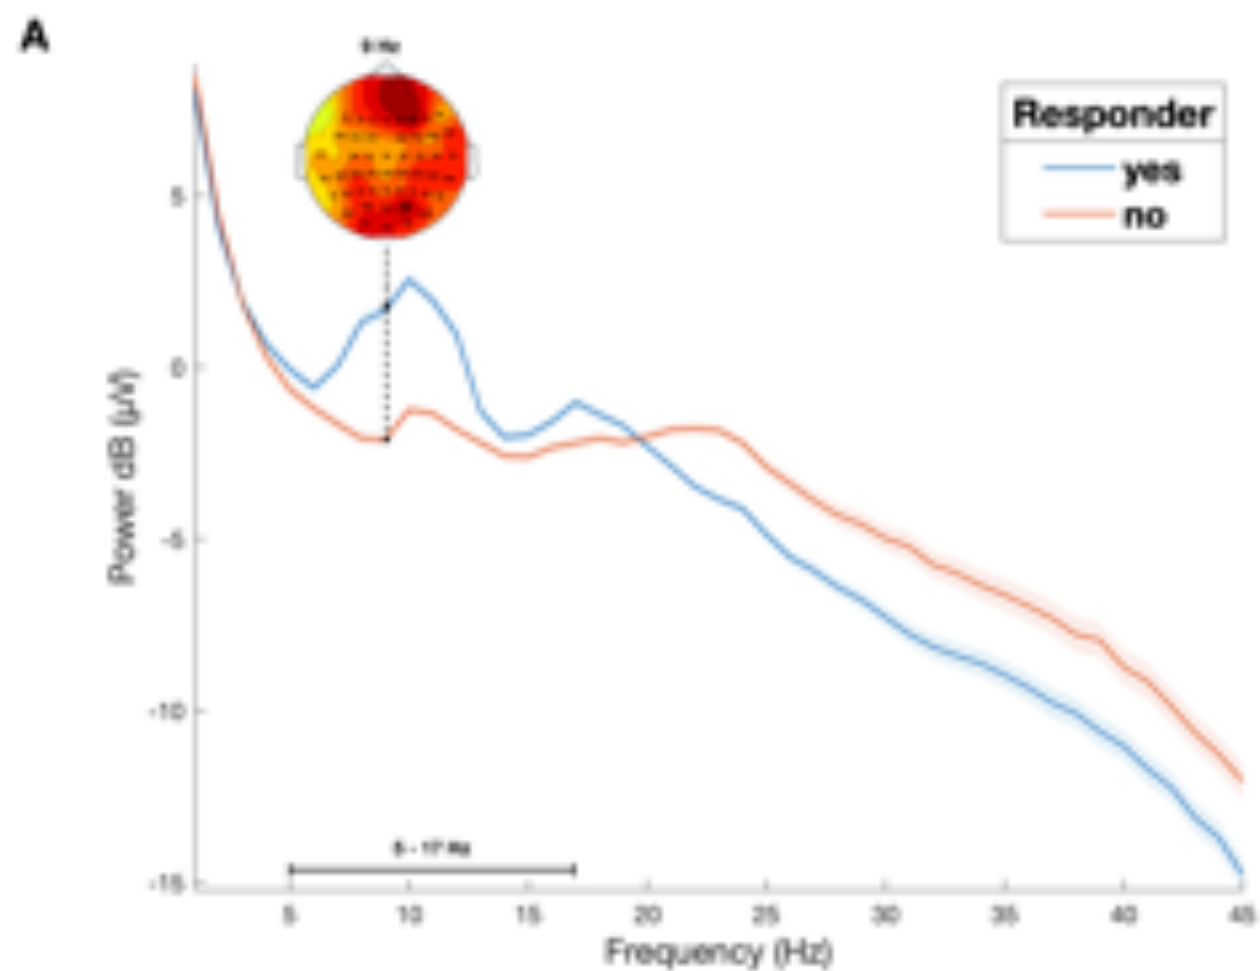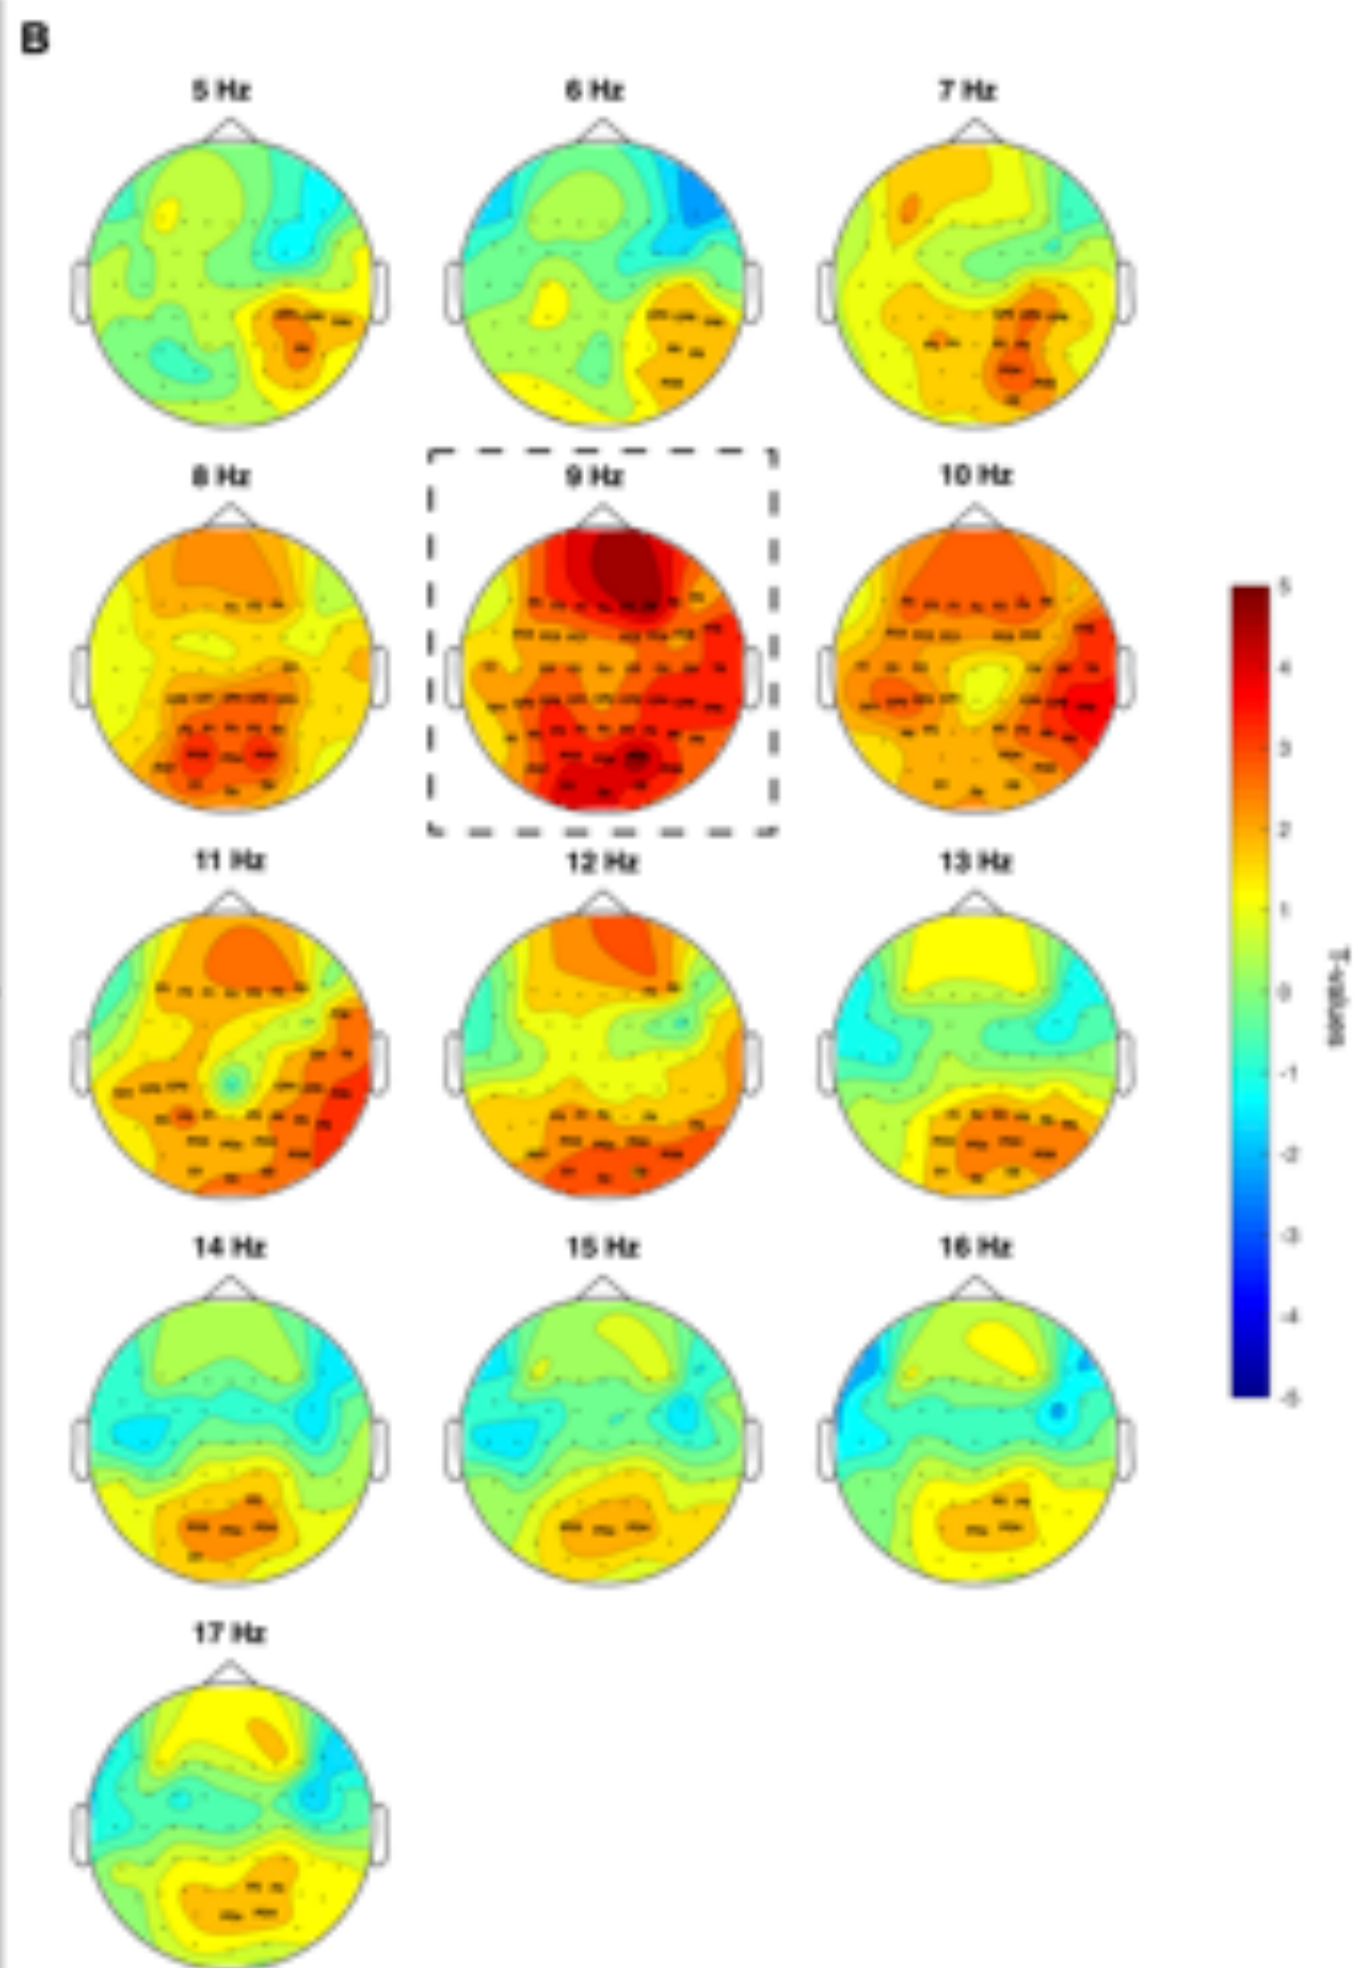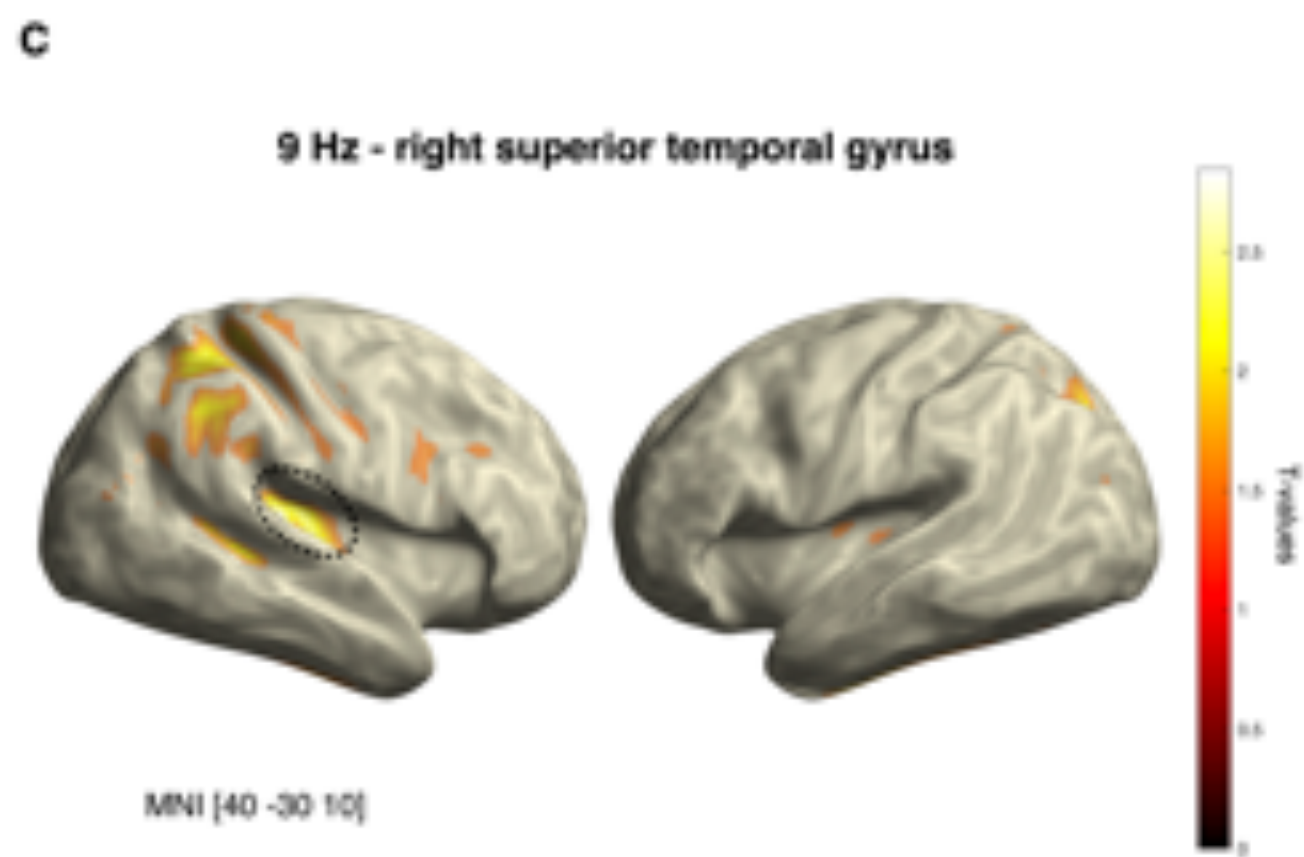

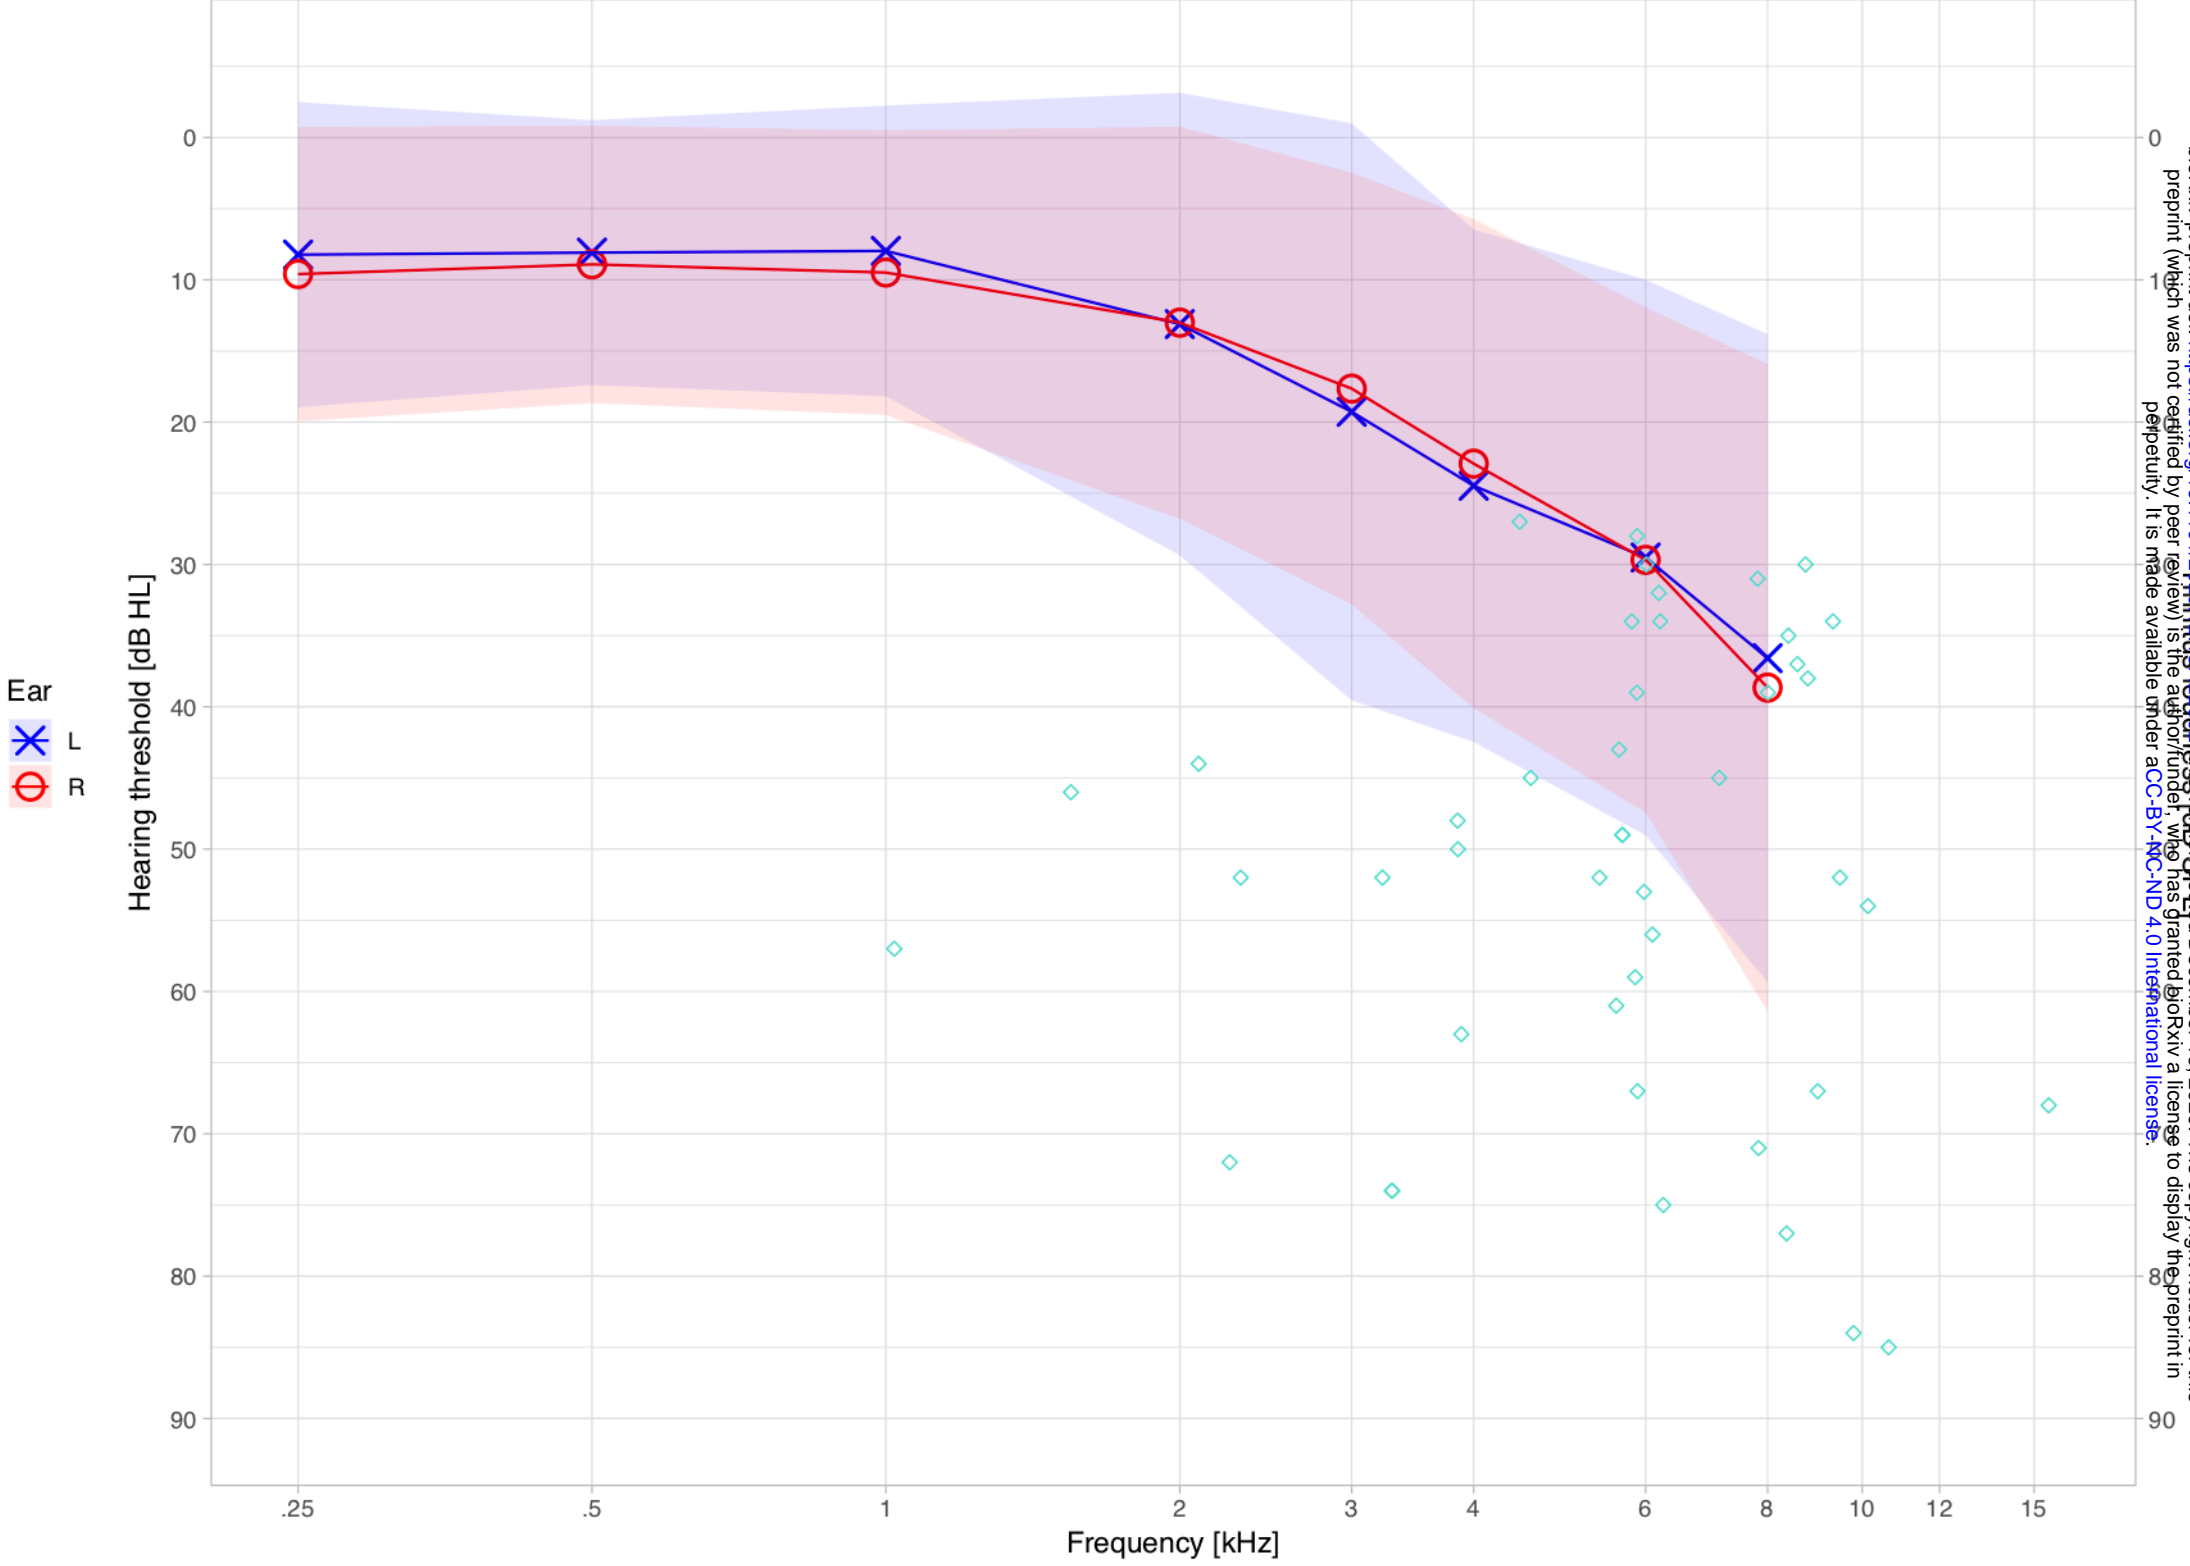

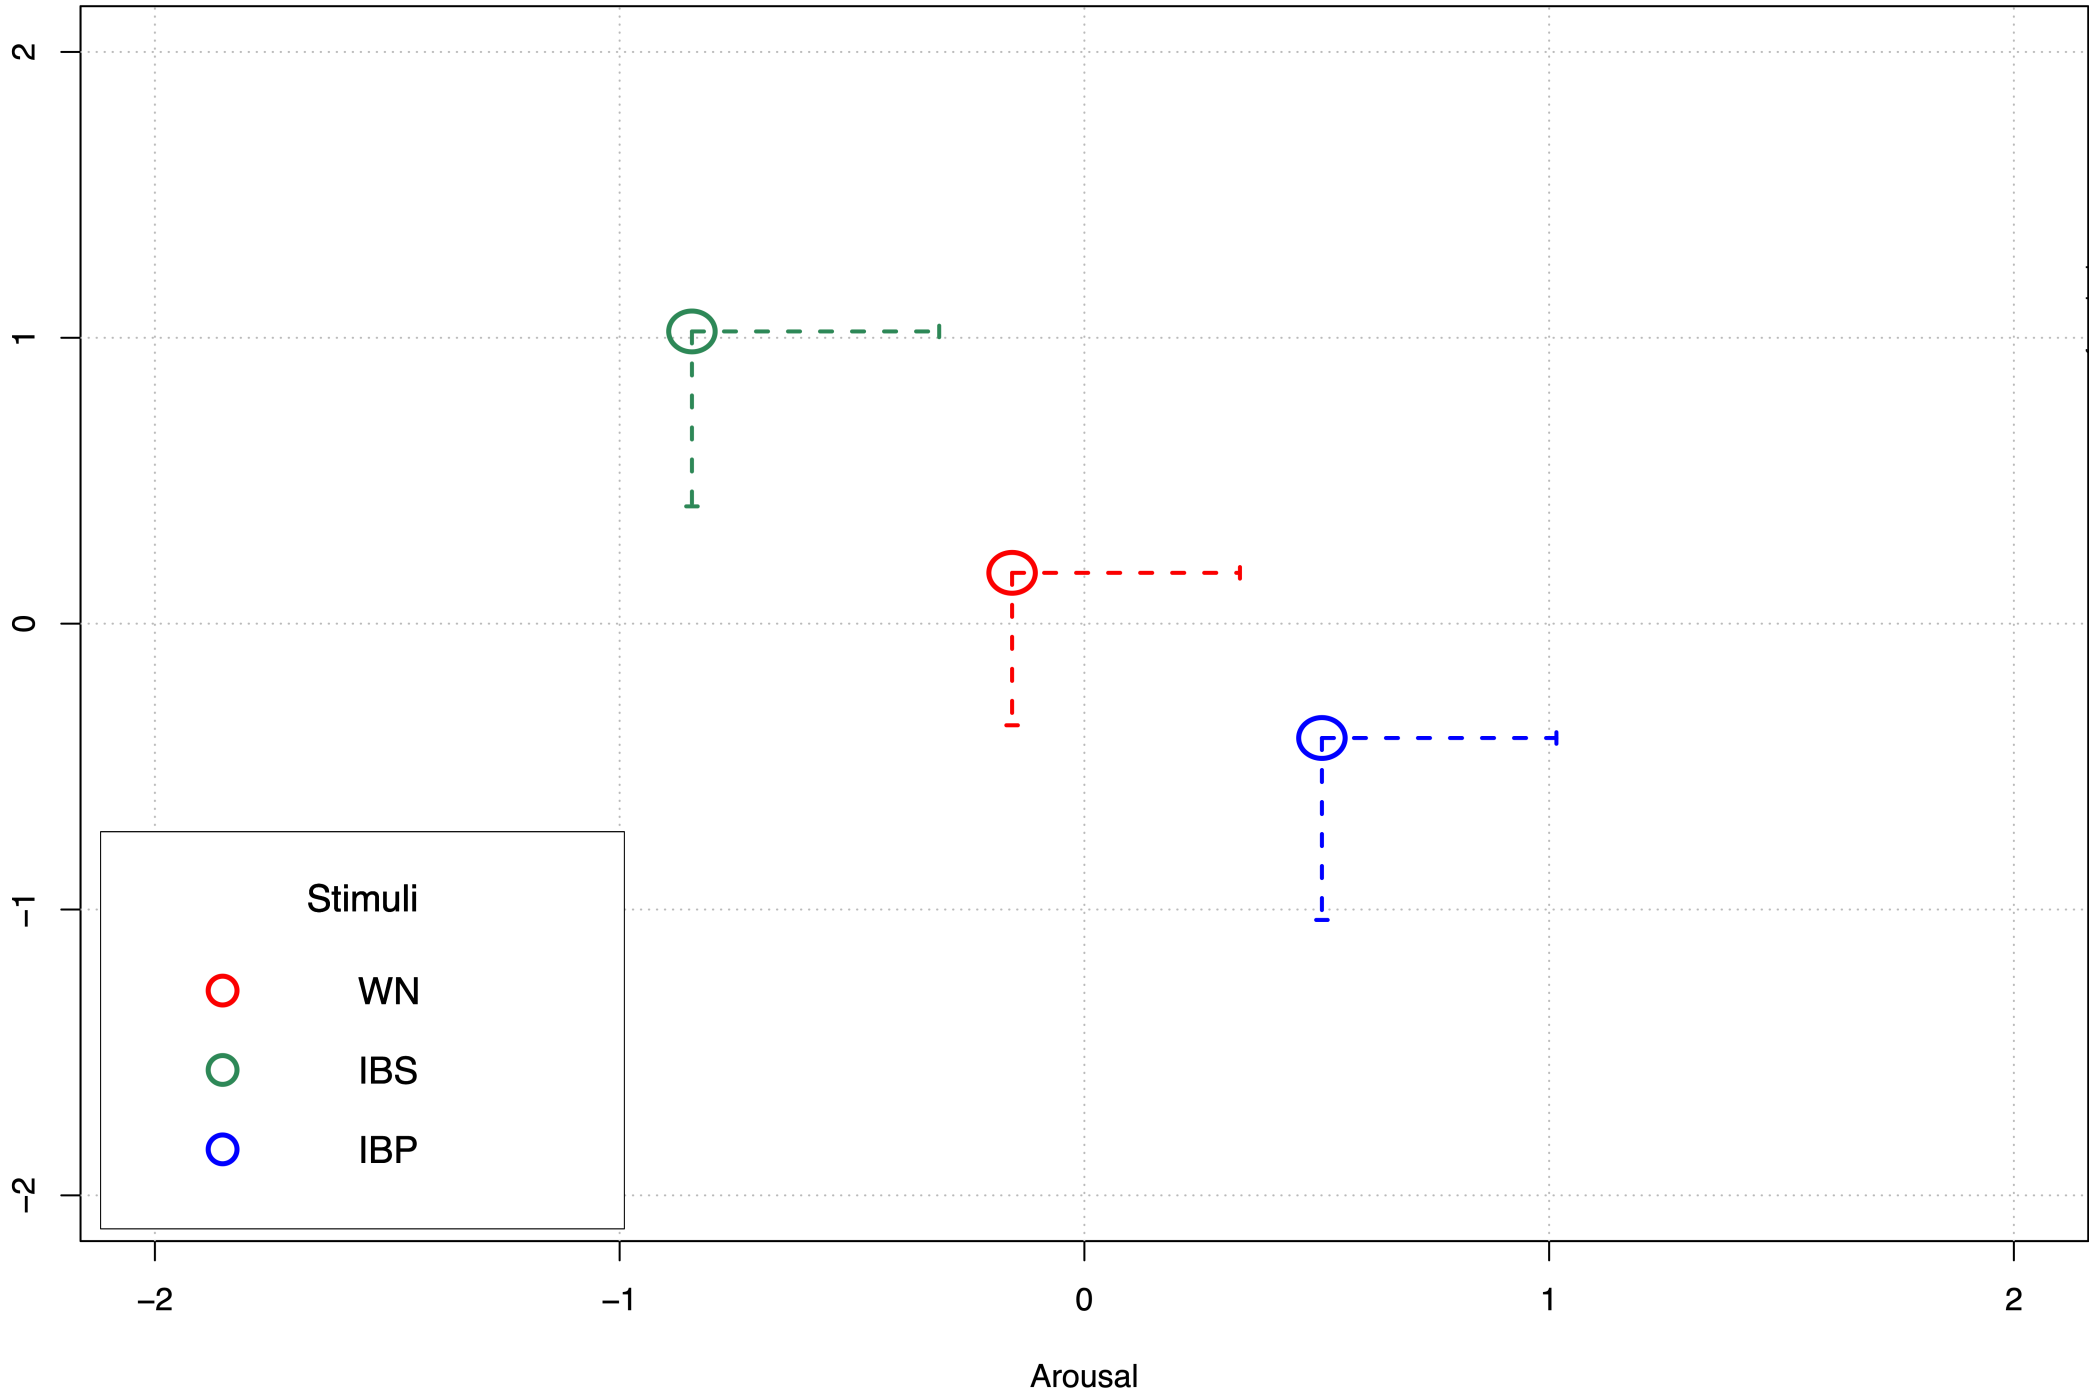

Source: https://www.biorxiv.org/content/10.1101/2020.12.15.422892v1.full.pdf
